# Supplementary material for: Circulating microRNAs for Early Diagnosis of Ovarian Cancer: A Systematic Review and Meta-Analysis
Source: MDPI journal article supplement (doi:10.3390/biom13050871), 2023-05-22

Supplemental Figure S1: Funnel plots

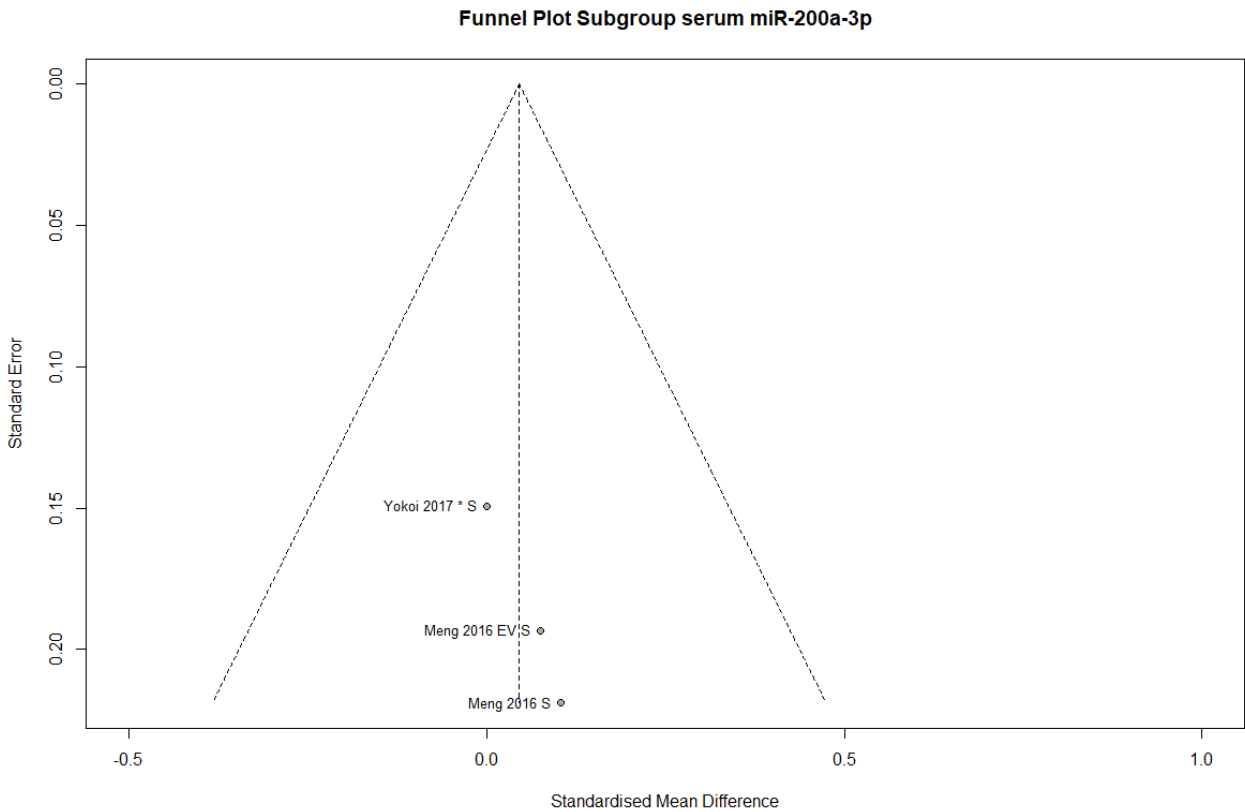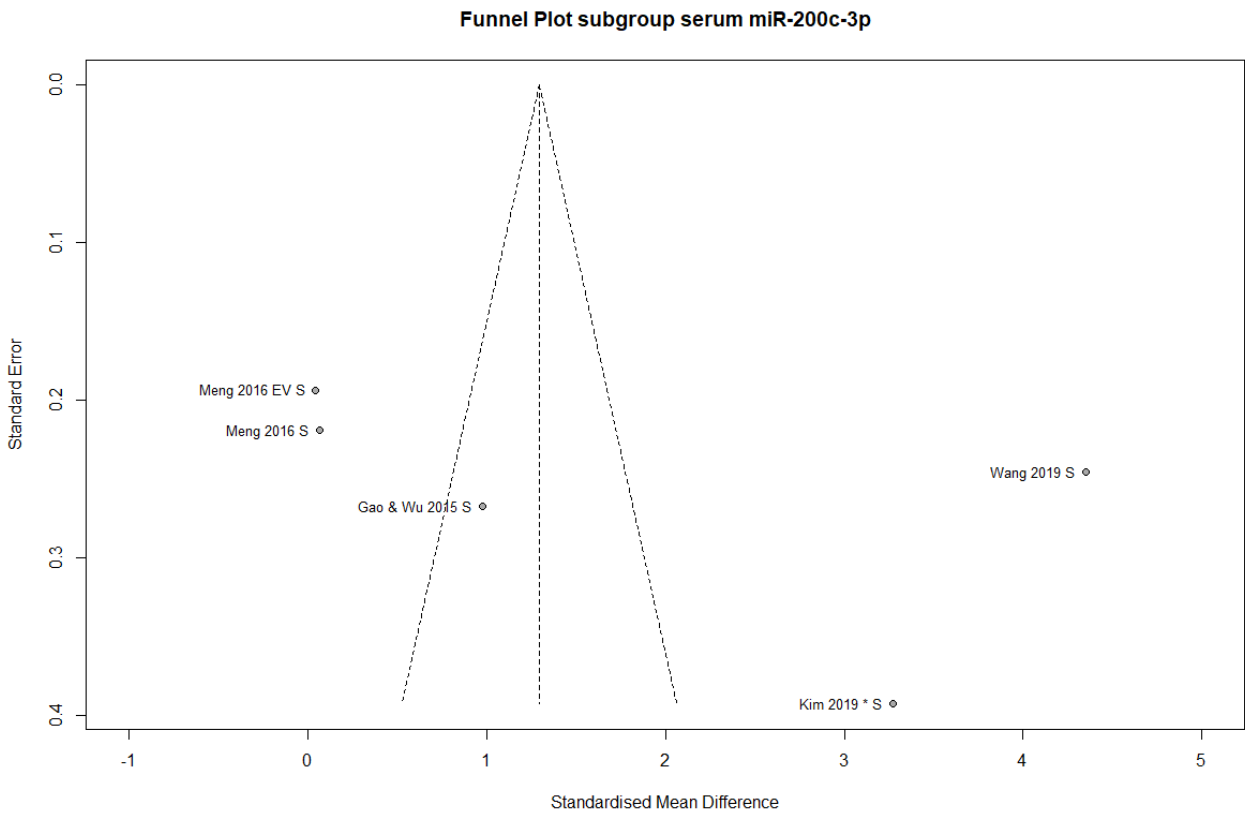

Funnel Plot plasma subgroup miR-205-5p

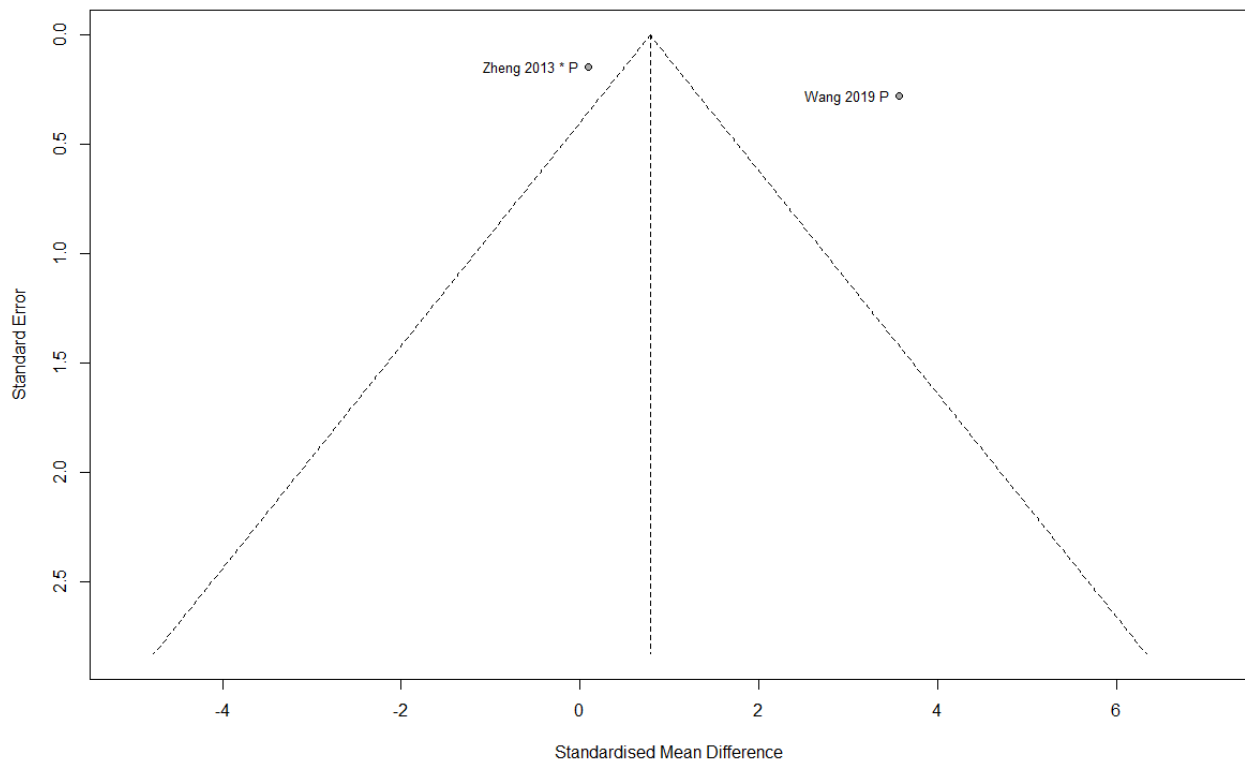

Funnel Plot subgroup plasma miR-200c-3p

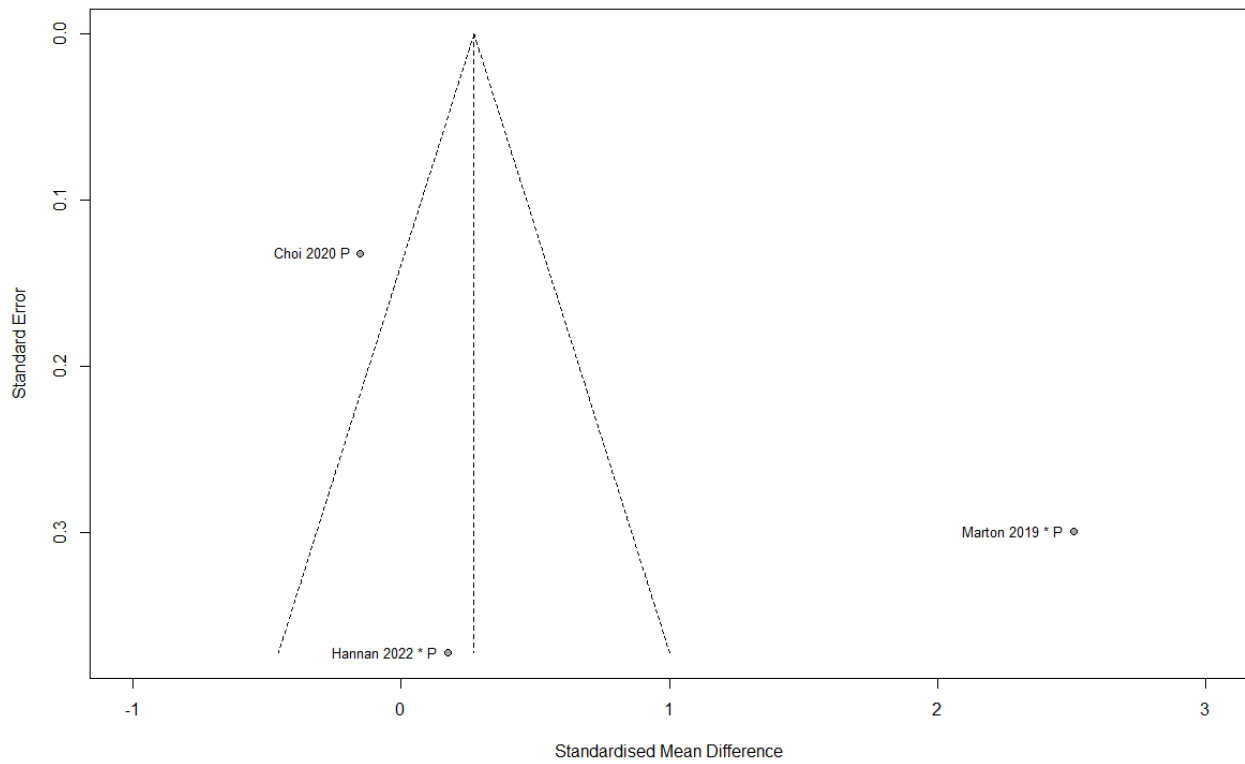

Funnel Plot miR-429-3p

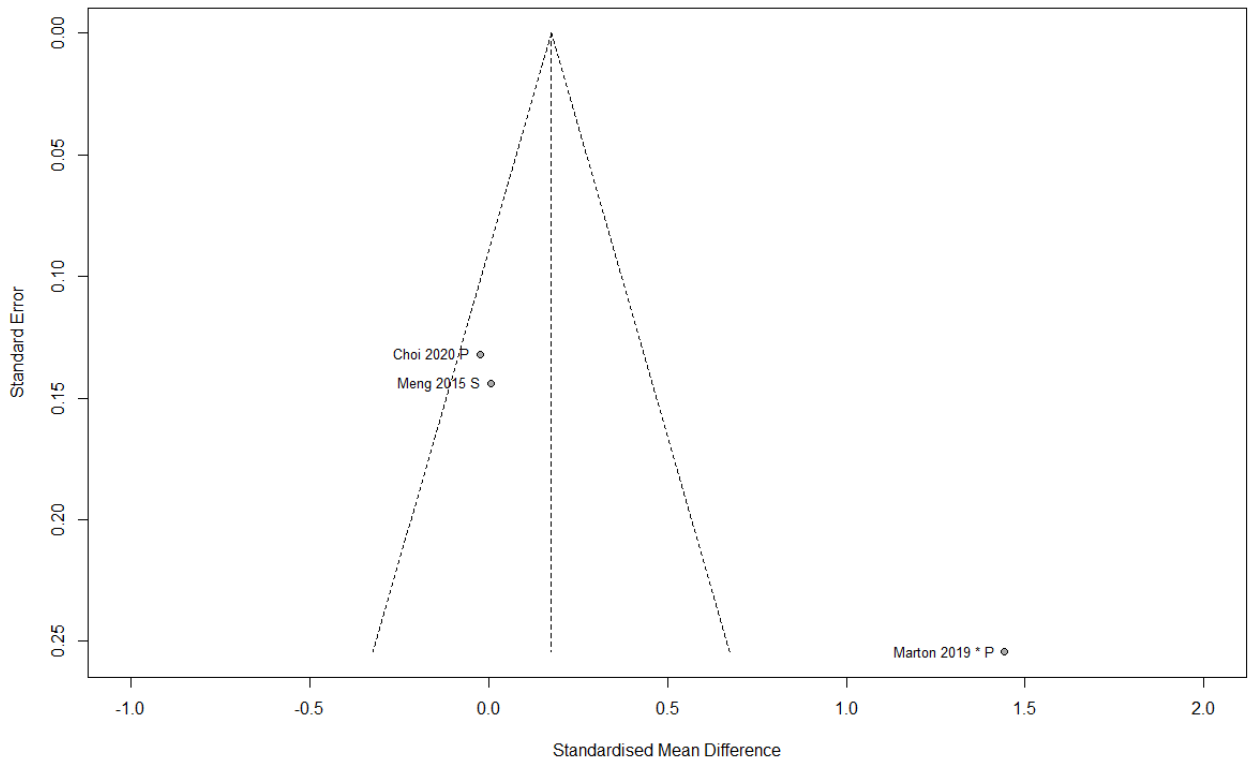

Funnel Plot miR-328-5p

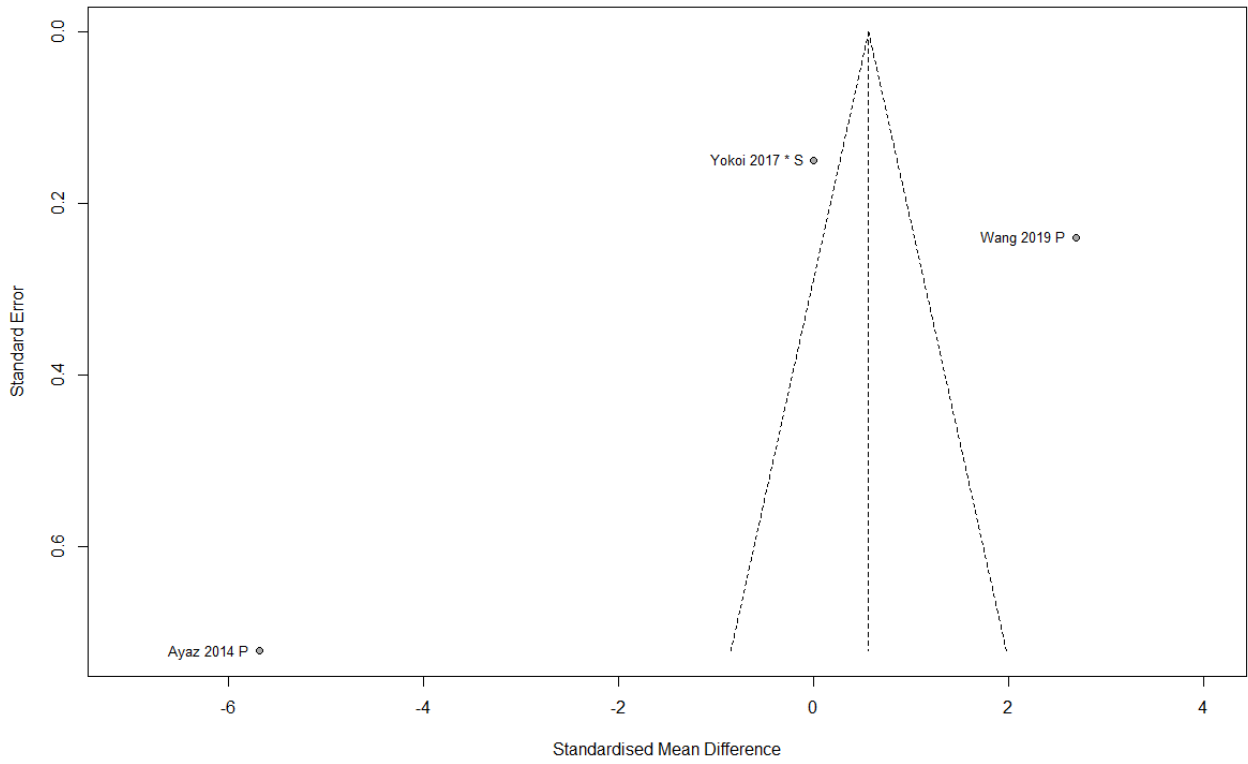

Funnel Plot miR-205-5p

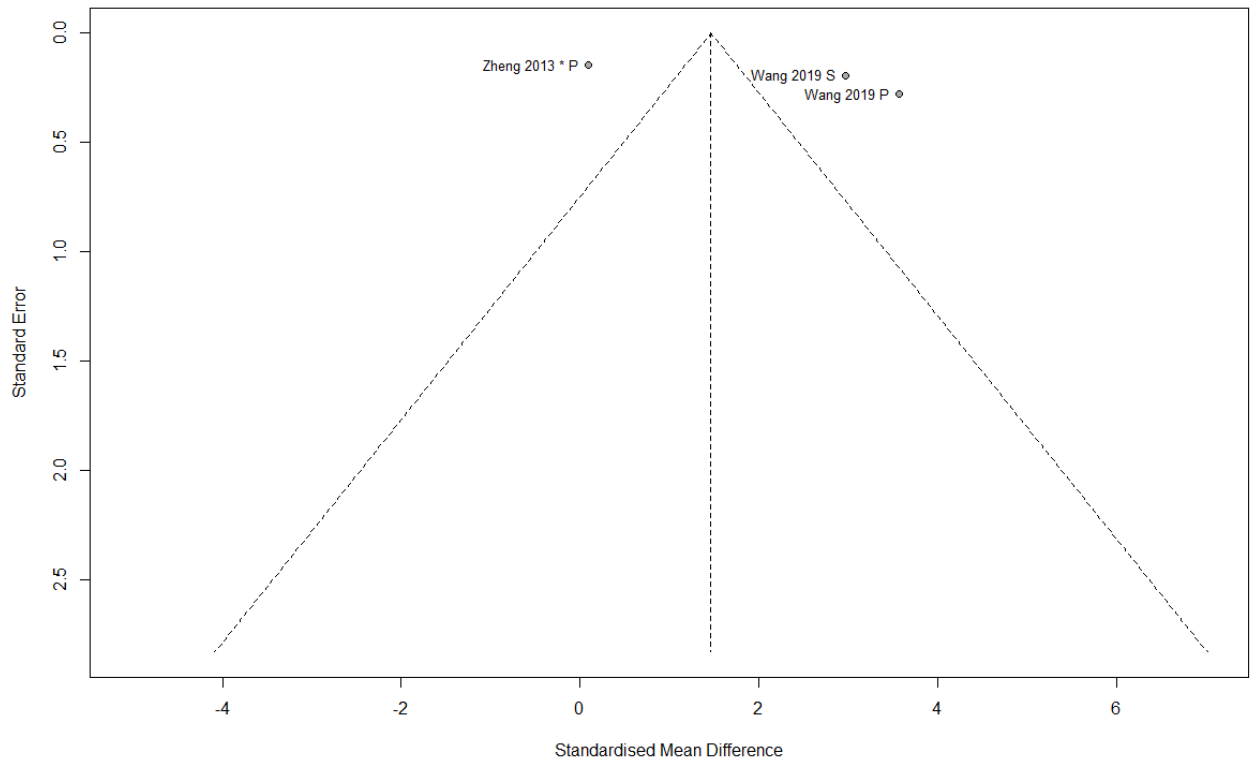

Funnel Plot miR-200c-3p

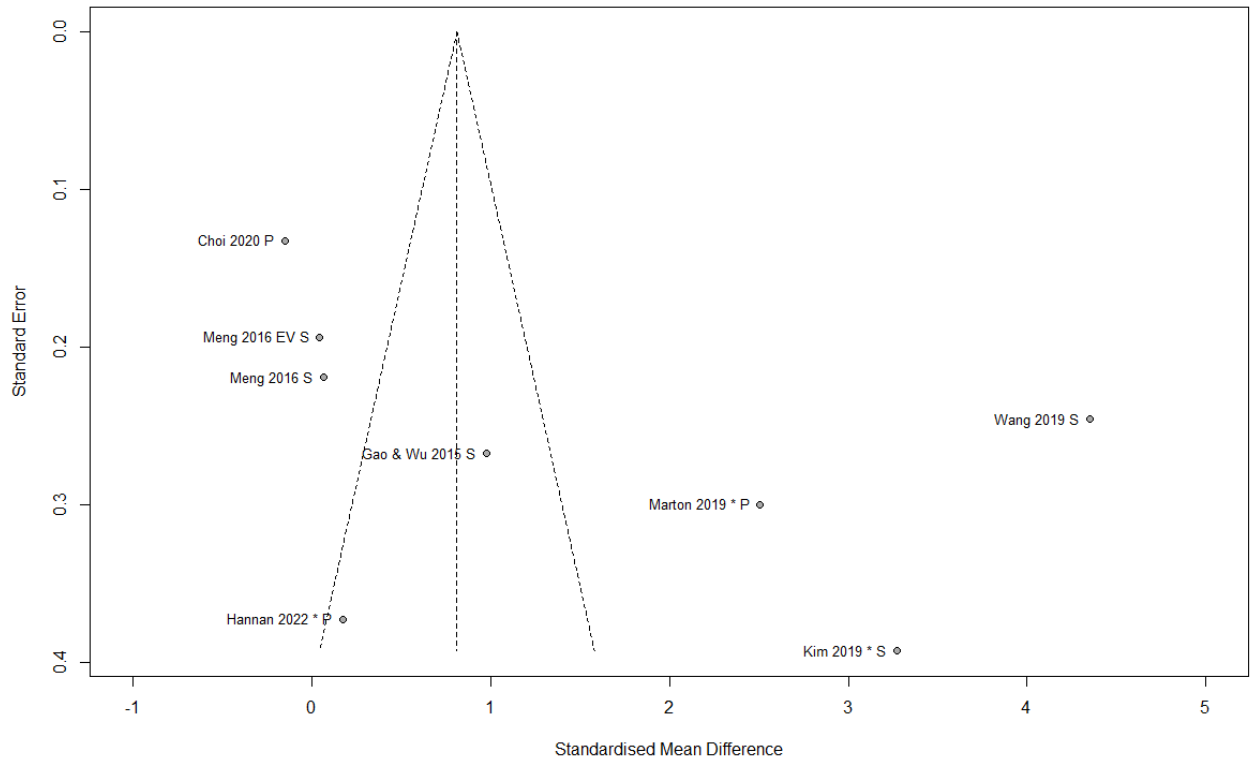

Funnel Plot miR-200b-3p

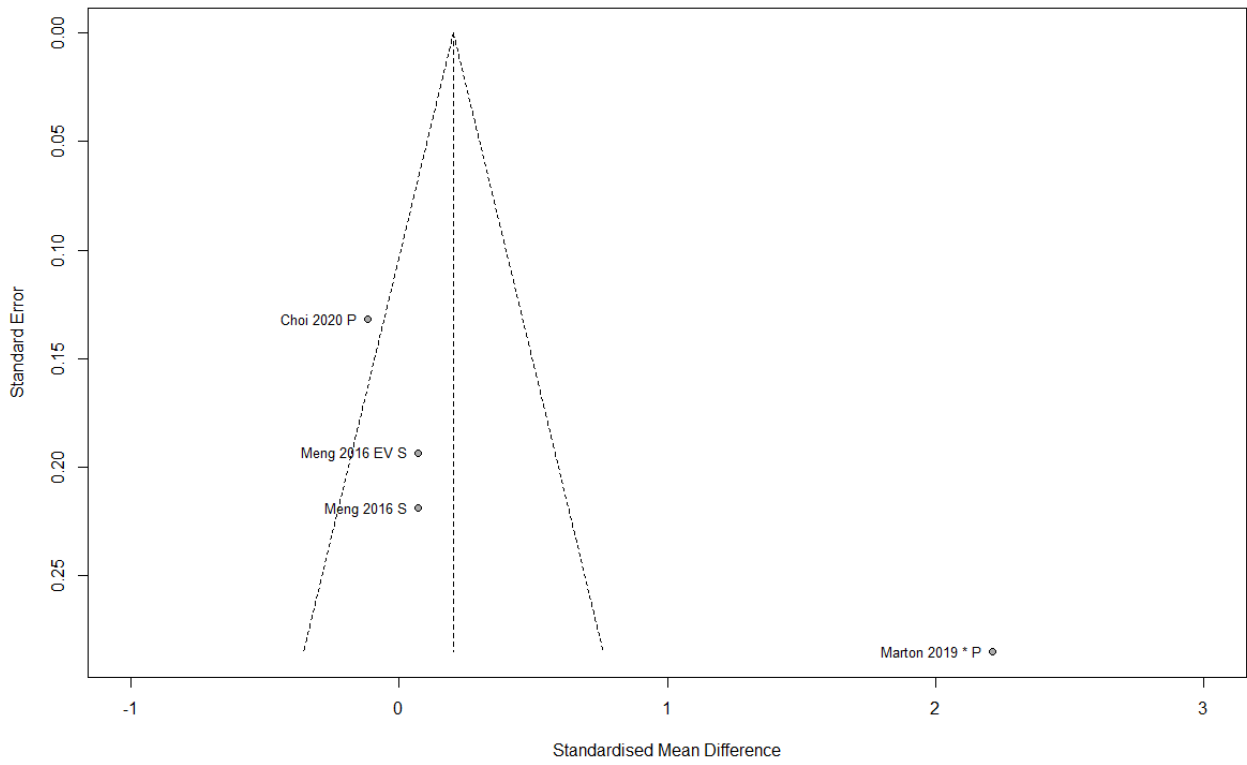

Funnel Plot miR-200a-3p

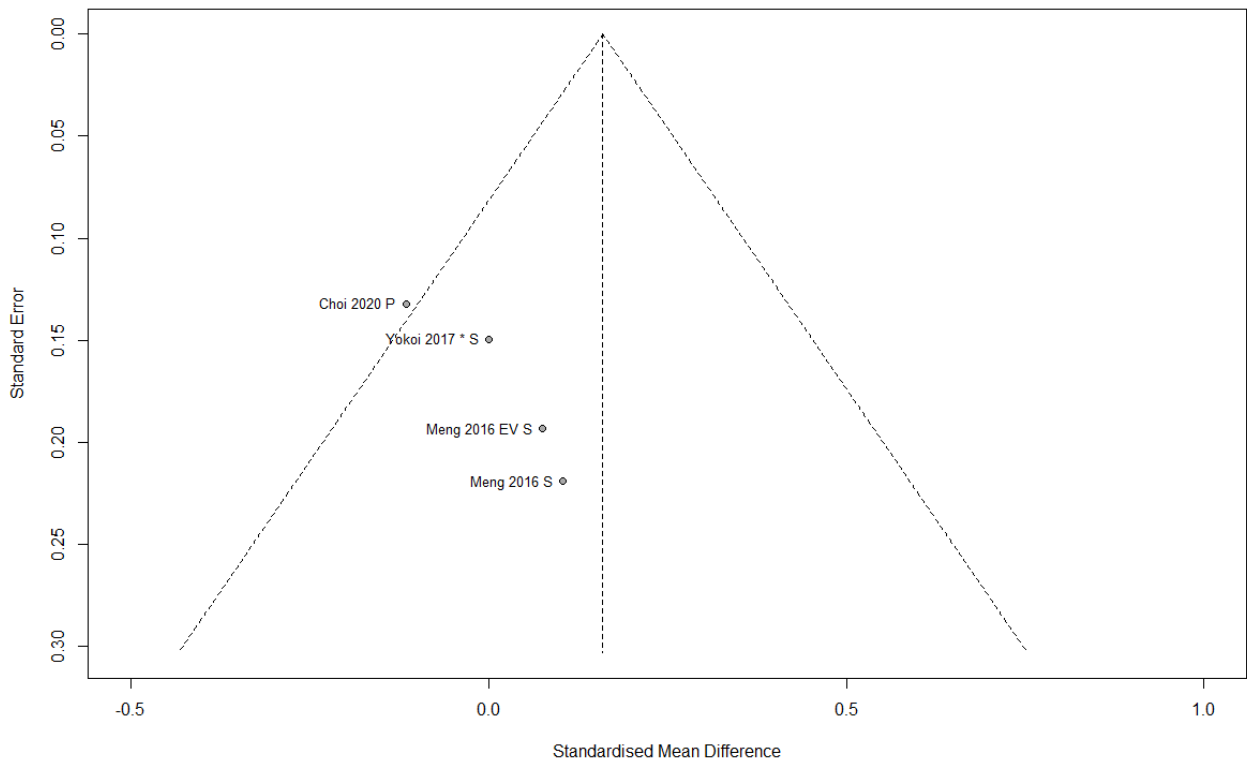

Funnel Plot miR-145b-5p

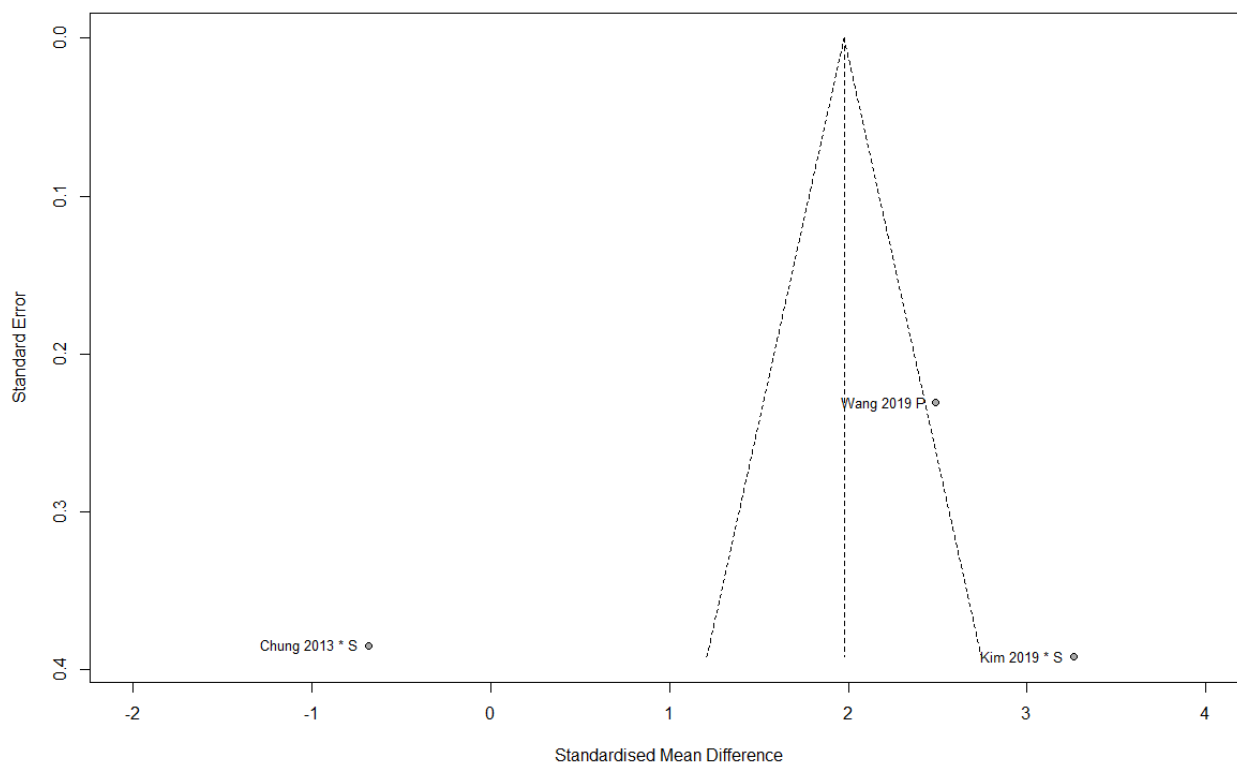

Funnel Plot miR-141-5p

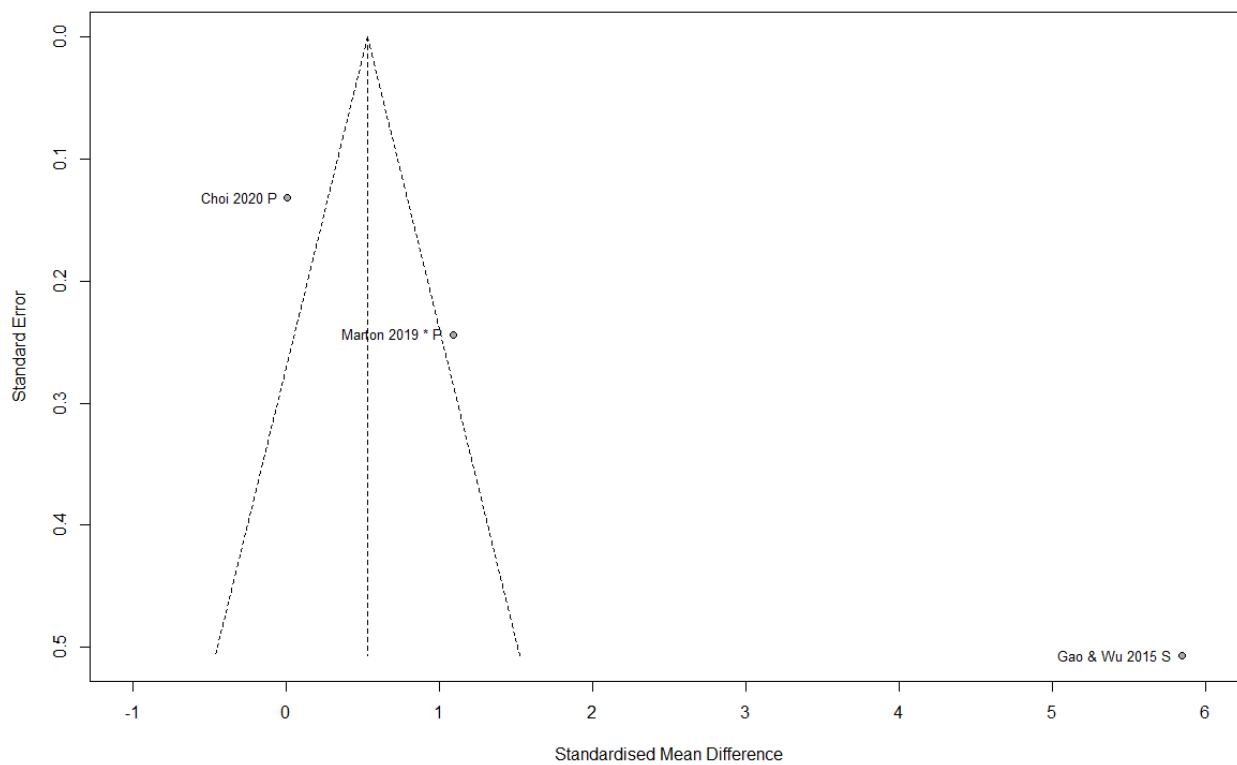

**Funnel Plot miR-125b-5p**

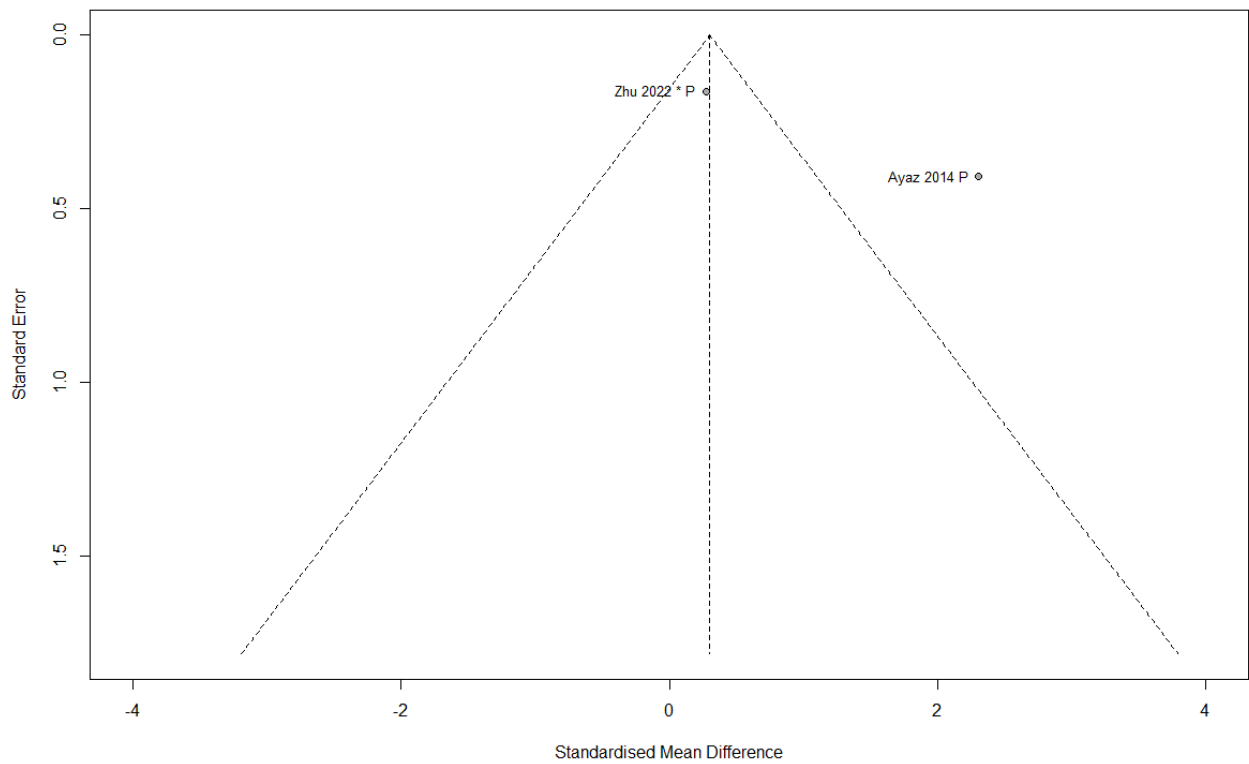

**Funnel Plot miR-106b-5p**

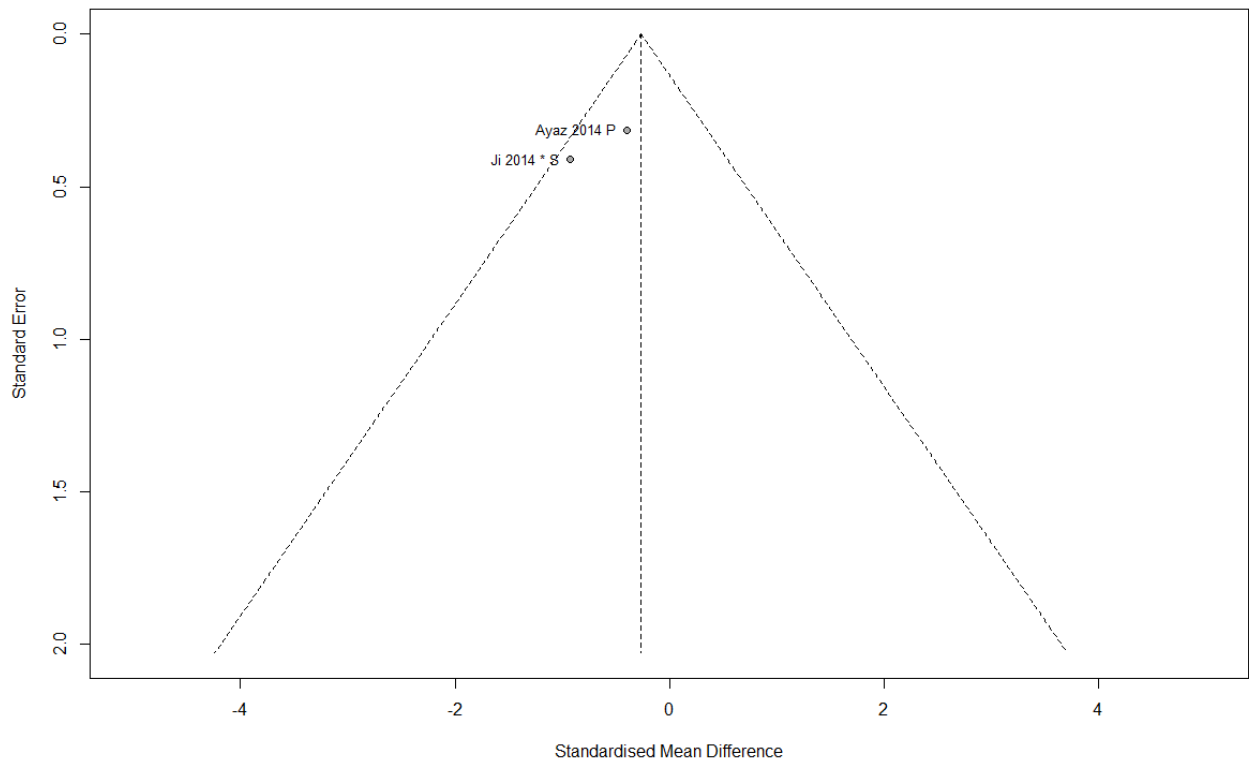

Funnel Plot miR-93-5p

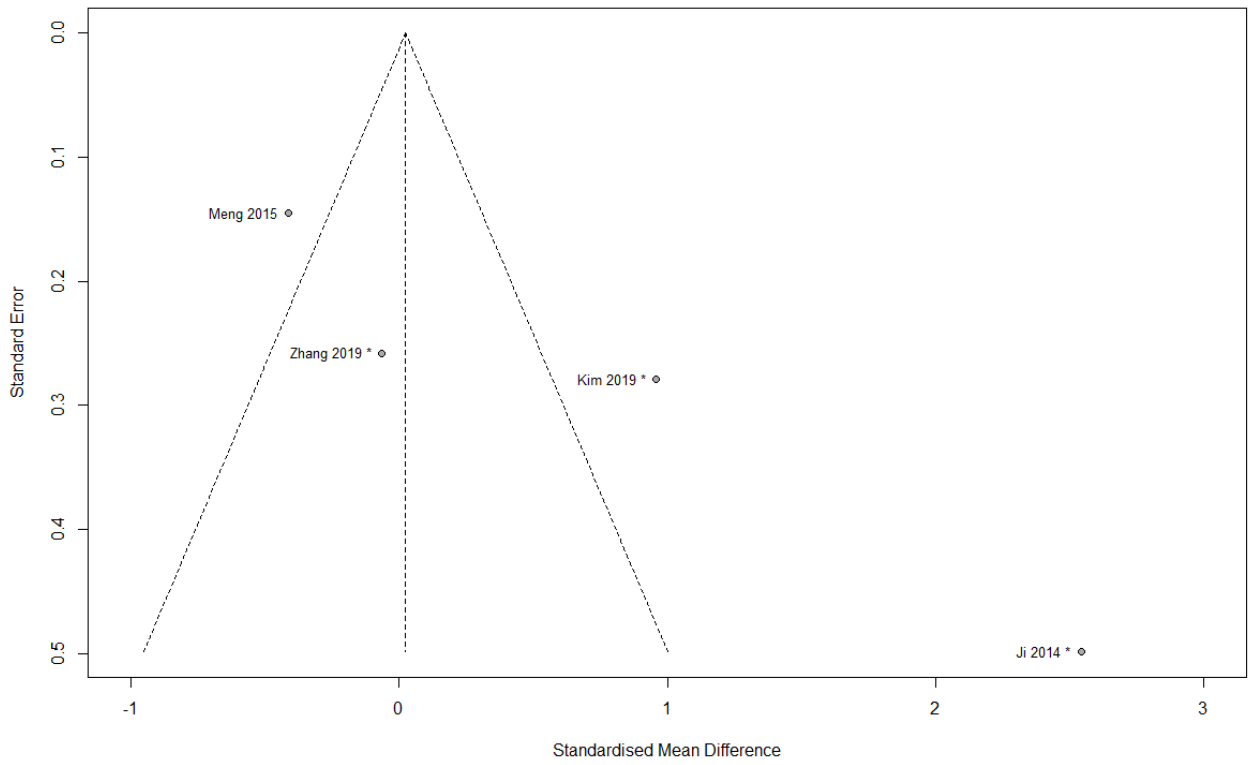

Funnel Plot miR-26-5p

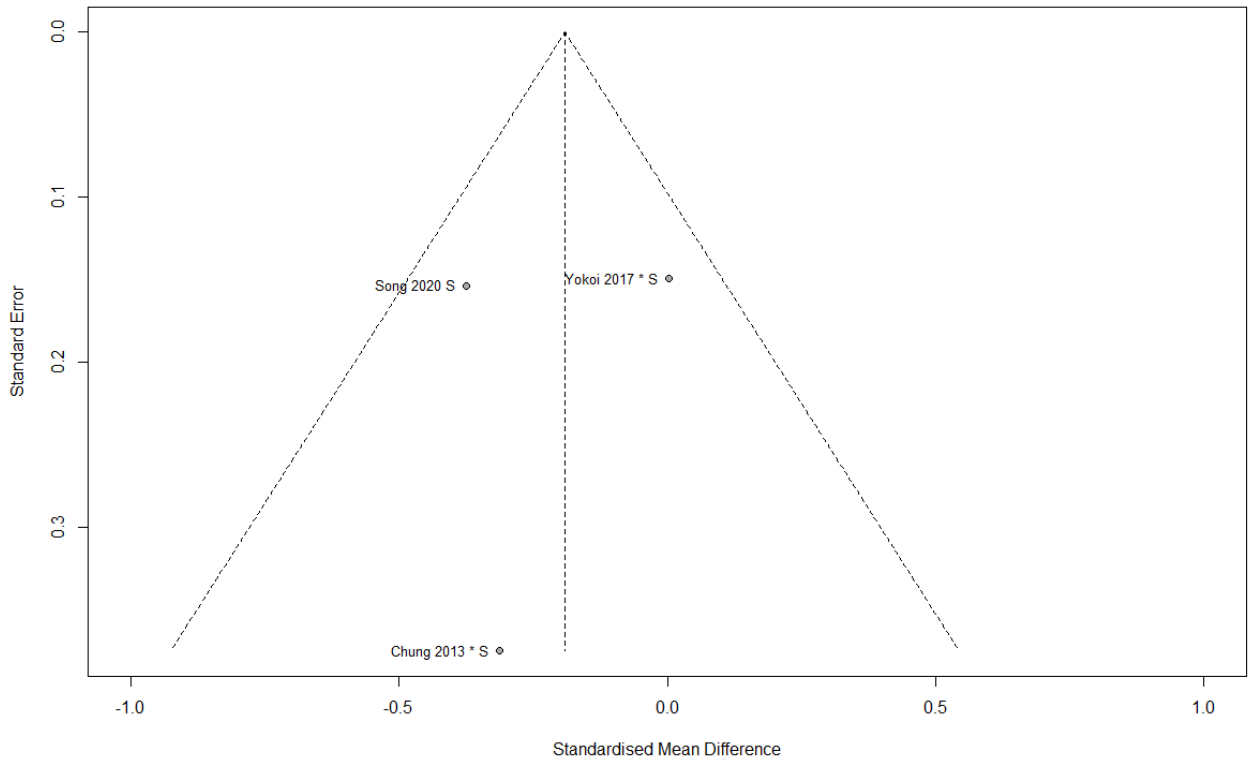

Funnel Plot miR-21-5p

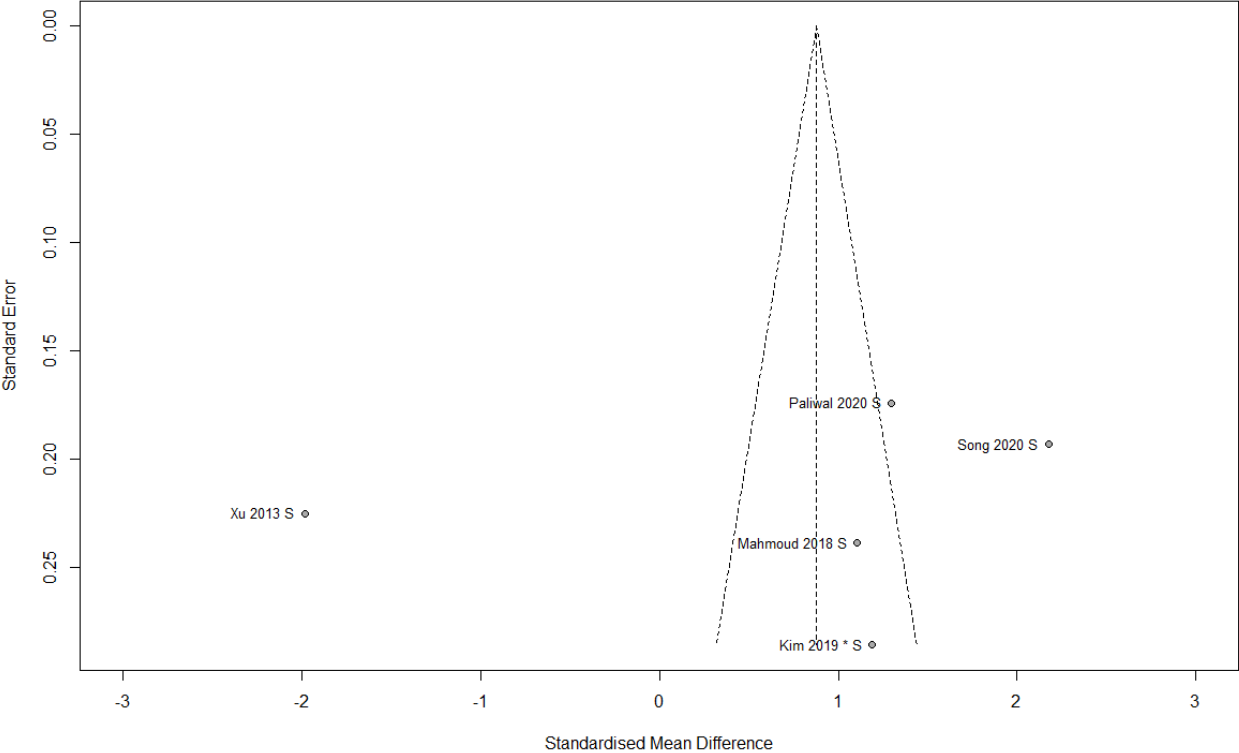

Supplement: s1 [file s1]
