# Supplementary material for: Circulating microRNAs for Early Diagnosis of Ovarian Cancer: A Systematic Review and Meta-Analysis
Source: Biomolecules. 2023 May 22;13(5):871. doi: 10.3390/biom13050871 (PMC10216356; doi:10.3390/biom13050871)
Supplement: Supplementary file 1 [file biomolecules-13-00871-s001.zip]

Archive with 4 entries (4 files):
- Supplementary Data file S1.xlsx
- Supplementary Figure S1.pdf
- Supplementary File S2 PRISMA 2020 abstract checklist.pdf
- Supplementary File S3 PRISMA 2020 checklist.pdf
