# Supplementary material for: Circulating microRNAs for Early Diagnosis of Ovarian Cancer: A Systematic Review and Meta-Analysis
Source: Biomolecules. 2023 May 22;13(5):871. doi: 10.3390/biom13050871 (PMC10216356; doi:10.3390/biom13050871)
Supplement: Supplementary file 1 [file biomolecules-13-00871-s001.zip › Supplementary Data file S1.xlsx]

## Sheet: Relative statistics
Author	miRNA	miRNA	N ctrl	N OC	Relative mean C	Relative SD C	Relative mean OC	Relative SD OC	Fold-change	SEM C	SEM OC	-95% CI C	+95% CI C	-95% CI OC	+95% CI OC
(Ayaz et al., 2014)	19	-19a-3p	24	18	1	0.90125	4.34694	1.93187	0.230047	0.183967	0.455347	2.00141	2.72256	9.37493	11.1599
(Ayaz et al., 2014)	19	-19b	24	18	1	4.16986	4.02782	13.0864	0.248273	0.85117	3.0845	-0.93625	2.40034	-3.09709	8.99416
(Ayaz et al., 2014)	20	-20a-5p	24	18	1	2.15846	0.482968	6.54322	2.07053	0.440593	1.54225	1.29489	3.02202	-1.98035	4.06528
(Ayaz et al., 2014)	24	-24-3p	24	18	1	8.05564	0.817902	7.51618	1.22264	1.64435	1.77158	-2.96231	3.48355	-3.25914	3.68546
(Ayaz et al., 2014)	25	-25-3p	24	18	1	118.603	2.02792	221.322	0.493116	24.2098	52.166	-47.424	47.4784	-102.19	102.3
(Ayaz et al., 2014)	27	-27a-3p	24	18	1	0.138696	0.76313	0.25349	1.31039	0.0283112	0.0597481	17.6976	17.8086	13.4308	13.665
(Ayaz et al., 2014)	27	-27b-3p	24	18	1	0.933033	1.04972	0.223756	0.952638	0.190455	0.0527399	9.27317	10.0198	10.0227	10.2294
(Ayaz et al., 2014)	29	-29a-3p	24	18	1	0.0310341	0.463294	0.0409498	2.15846	0.00633482	0.00965196	70.5095	70.5343	32.6535	32.6913
(Ayaz et al., 2014)	29	-29c-3p	24	18	1	0.14161	0.48971	0.122428	2.04202	0.0289061	0.0288564	24.1948	24.3081	11.8196	11.9327
(Ayaz et al., 2014)	30	-30a-5p	24	18	1	25.2813	4.65893	39.6706	0.214641	5.16053	9.35046	-9.91849	10.3108	-17.4131	19.2407
(Ayaz et al., 2014)	30	-30b-5p	24	18	1	0.619854	0.939523	1.07177	1.06437	0.126527	0.252619	2.84714	3.34312	2.41281	3.40308
(Ayaz et al., 2014)	30	-30c-5p	24	18	1	15.3482	0.381565	34.2968	2.62079	3.13294	8.08382	-5.94442	6.33672	-15.7694	15.9191
(Ayaz et al., 2014)	34	-34c-5p	24	18	1	0.02836	0.339151	0.332171	2.94854	0.00578896	0.0782936	68.1083	68.131	22.9494	23.2563
(Ayaz et al., 2014)	92	-92-3p	24	18	1	28.6408	0.5	53.8174	2	5.84628	12.6849	-11.3839	11.5335	-24.8249	24.8998
(Ayaz et al., 2014)	106	-106b-5p	24	18	1	1.31951	0.356013	1.89212	2.80889	0.269343	0.445976	1.04126	2.09708	-0.315469	1.43276
(Ayaz et al., 2014)	125	-125b-5p	24	18	1	0.236514	1.87905	0.503478	0.532185	0.0482783	0.118671	4.86421	5.05346	9.08527	9.55046
(Ayaz et al., 2014)	126	-126-3p	24	18	1	0.790041	0.716978	2.18859	1.39474	0.161267	0.515855	1.68392	2.31608	0.422879	2.44503
(Ayaz et al., 2014)	146	-146a-5p	24	18	1	0.11744	0.61132	0.11744	1.6358	0.0239724	0.027681	19.2459	19.3399	11.7399	11.8484
(Ayaz et al., 2014)	150	-150-5p	24	18	1	165.421	21.1121	625.992	0.0473661	33.7665	147.548	-66.1603	66.2042	-288.73	289.657
(Ayaz et al., 2014)	191	-191-5p	24	18	1	0.101532	0.0454366	10.8528	22.0087	0.020725	2.55804	32.6318	32.713	-3.52923	6.49828
(Ayaz et al., 2014)	193	-193b-3p	24	18	1	0.0532897	0.535887	0.353553	1.86607	0.0108777	0.0833333	49.5008	49.5434	26.3749	26.7016
(Ayaz et al., 2014)	206	-206	24	18	1	19.9733	666.287	16.2234	0.00150085	4.07703	3.82388	-7.81297	8.16899	111.108	126.098
(Ayaz et al., 2014)	218	-218-5p	24	18	1	27.6652	2.62079	59.3016	0.381565	5.64713	13.9775	-10.9335	11.2033	-27.0424	27.7495
(Ayaz et al., 2014)	223	-223-3p	24	18	1	22.0087	4.28709	19.9733	0.233258	4.4925	4.70775	-8.34839	9.26222	-7.26835	11.186
(Ayaz et al., 2014)	320	-320a	24	18	1	0.0351581	0.119908	0.0493776	8.33973	0.00717661	0.0116384	62.6688	62.697	7.49337	7.53899
(Ayaz et al., 2014)	324	-324-3p	24	18	1	0.118257	0.463294	0.129408	2.15846	0.0241392	0.0305018	28.5935	28.6881	13.2093	13.3289
(Ayaz et al., 2014)	328	-328	24	18	1	0.0366511	0.524858	0.118257	1.90528	0.00748137	0.0278735	56.4783	56.5077	29.5962	29.7055
(Ayaz et al., 2014)	451	-451	24	18	1	240.518	2.56685	670.921	0.389582	49.0955	158.138	-96.2179	96.2364	-309.926	309.974
(Ayaz et al., 2014)	548	-548a-3p	24	18	1	0.0293601	0.0651541	0.116629	15.3482	0.0059931	0.0274897	68.1079	68.1314	4.3844	4.49216
(Ayaz et al., 2014)	548	-548c-3p	24	18	1	1.68413	3.70635	1.55833	0.269807	0.343771	0.367302	0.532017	1.8796	3.74924	5.18906
(Ayaz et al., 2014)	574	-574-3p	24	18	1	39.6706	0.14161	935.763	7.06162	8.09774	220.562	-13.3921	18.351	-431.95	432.652
(Ayaz et al., 2014)	576	-576-3p	24	18	1	0.493116	0.76313	0.205898	1.31039	0.100657	0.0485306	11.9284	12.323	9.15839	9.34863
(Ayaz et al., 2014)	590	-590-5p	24	18	1	17.0299	0.148651	9.71356	6.72717	3.47622	2.28951	-6.55096	7.07582	-4.44843	4.52645
(Ayaz et al., 2014)	601	-601	24	18	1	33225.4	0.687771	29328.2	1.45397	6782.11	6912.72	-13292.9	13292.9	-13548.9	13548.9
(Ayaz et al., 2014)	645	-645	24	18	1	282.088	205.074	138.141	0.00487629	57.5809	32.5602	-112.84	112.877	-60.0599	67.5761
(Ayaz et al., 2014)	720	-720	24	18	1	0.0953912	0.532185	0.167241	1.87905	0.0194716	0.0394191	33.7864	33.8627	17.9237	18.0782
(Chen et al. 2020)	125	-125b	42	152	1	0.0379529	0.297131	0.0113606	0.619054	0.00585626	0.00092147	0.988522	1.01148	0.295325	0.298938
(Choi et al. 2020)	141	-141	112	118	1	8.76413	1.03947	1.56883	0.659754	0.828133	0.144422	-1.62311	1.62317	-0.283051	0.283086
(Choi et al. 2020)	429	-429	112	118	1	8.76614	0.850515	1.31902	7.46426	0.828322	0.121425	-1.62351	1.62351	-0.237983	0.238004
(Choi et al. 2020)	200a	-200a	112	118	1	2.42826	0.767773	1.48308	29.8571	0.229449	0.136528	-0.44972	0.449721	-0.267582	0.267609
(Choi et al. 2020)	200b	-200b	112	118	1	2.80379	0.7277	1.62763	55.7152	0.264933	0.149836	-0.519269	0.519269	-0.293657	0.2937
(Choi et al. 2020)	200c	-200c	112	118	1	2.42826	0.697143	1.44928	39.3966	0.229449	0.133417	-0.449715	0.449726	-0.261285	0.261711
(Chung et al., 2013) *	26	-26a	12	18	1	1.226	0.75	0.1252	0.75	4.24699	0.531179	0.951941	1.00368	0.746319	0.753681
(Chung et al., 2013) *	132	-132	12	18	1	1.04222	0.444444	1.05125	0.444444	3.61036	4.46008	0.998162	1.00082	0.44362	0.445269
(Chung et al., 2013) *	143	-143	12	18	1	1.15968	0.354839	1.27182	0.354839	4.01724	5.39587	0.992954	1.00274	0.352097	0.357581
(Chung et al., 2013) *	145	-145	12	18	1	0.624344	0.141658	1.48148	0.141658	2.16279	6.28539	0.976676	1.00784	0.133818	0.149498
(Chung et al., 2013) *	let7	Let-7b	12	18	1	1.21292	0.0594641	1.20675	0.0594641	4.20169	5.11979	-0.65914	1.09816	-0.0386927	0.157621
(Gao & Wu, 2015)	141	-141	19	74	1	0.267114	2.02511	0.141948	2.02511	0.0612801	0.0165012	0.879891	1.12011	1.99277	2.05745
(Gao & Wu, 2015)	200c	-200c-3p	19	74	1	0.465487	1.58997	0.627467	1.58997	0.10679	0.0729416	0.790691	1.20931	1.44701	1.73294
(Hannan et al. 2022) *	200c	-200c	15	14	1	5.2201	1.86957	4.4378	1.86957	1.34782	1.18605	-1.64173	3.64173	-0.455091	4.19423
(Hashimoto et al. 2021)	1307	-1307-3p	9	7	1	1.20734	1.3474	1.08795	1.3474	0.402448	0.411206	0.211201	1.7888	0.541437	2.15336
(Jeon et al., 2022) *	1246	-1246	13	71	1	2.5943	1.28165	3.16763	1.28165	0.719528	0.152104	-0.410276	2.41028	0.983525	1.57977
(Jeon et al., 2022) *	1290	-1290	13	71	1	1.16623	2.06051	9.19453	2.06051	0.323455	0.244537	0.366029	1.63397	1.58121	2.5398
(Ji et al., 2014) *	22	-22	8	31	1	1.15669	4	1.32869	8	0.408951	0.238639	0.198456	1.80154	3.53227	4.46773
(Ji et al., 2014) *	93	-93	8	31	1	1.15669	4.41	1.34723	10.6295	0.408951	0.24197	0.198456	1.80154	3.93574	4.88426
(Ji et al., 2014) *	106	-106b	8	31	1	1.01403	0.04	1.01572	0.514057	0.358514	0.182428	0.297313	1.70269	-0.31756	0.39756
(Ji et al., 2014) *	451	-451	8	31	1	1.01403	3.9204	1.40406	7.57056	0.358514	0.252176	0.297313	1.70269	3.42614	4.41466
(Kim et al. 2019)*	21	-21	20	48	1	5.96557	12.7828	10.9645	12.7828	1.33394	1.58258	-1.61453	3.61453	9.68098	15.8847
(Kim et al. 2019)*	93	-93	20	48	1	6.33629	9.0883	9.02576	9.0883	1.41684	1.30276	-1.777	3.777	6.53489	11.6417
(Kim et al. 2019)*	145	-21	20	48	1	6.27513	29.0909	9.2693	29.0909	1.40316	1.33791	-1.7502	3.7502	26.4686	31.7132
(Kim et al. 2019)*	200c	-200c	20	48	1	5.96285	26.7366	8.40086	26.7366	1.33333	1.21256	-1.61333	3.61333	24.36	29.1132
(Kobayashi et al. 2018) *	1290	-1290	13	70	1	0.463235	2.47794	1.22255	2.47794	0.128478	0.146123	0.748182	1.25182	2.19154	2.76434
(Liu et al. 2021)	1273	f	21	34	1	0.846139	1.47939	0.215088	1.47939	0.184643	0.0368873	0.6381	1.3619	1.40709	1.55169
(Liu et al. 2021)	4732	5p	21	34	1	8.9555	20.3224	0.118421	20.3224	1.95425	0.0203091	-2.83033	4.83033	20.2826	20.3622
(Mahmoud, Fawzy, & A Elshimy, 2018)	21	-21	30	60	1	2.44567	7.875	7.32601	7.875	0.446515	0.945783	0.12483	1.87517	6.02126	9.72874
(Marton et al. 2019)*	34	-34a	60	28	1	2.66718	3.2229	2.46558	3.2229	0.344331	0.46595	0.325111	1.67489	2.30964	4.13617
(Marton et al. 2019)*	34	-34b	60	28	1	1.78959	2.31598	1.7954	2.31598	0.231035	0.339299	0.547172	1.45283	1.65096	2.98101
(Marton et al. 2019)*	34	-34c	60	28	1	1.84474	1.12478	2.77812	1.12478	0.238155	0.525015	0.533217	1.46678	0.0957548	2.15381
(Marton et al. 2019)*	141	-141	60	28	1	2.44098	3.64132	2.31879	3.64132	0.315129	0.43821	0.382347	1.61765	2.78243	4.50021
(Marton et al. 2019)*	429	-429	60	28	1	2.44005	4.36006	1.99085	4.36006	0.31501	0.376235	0.382581	1.61742	3.62264	5.09748
(Marton et al. 2019)*	200a	-200a	60	28	1	25.02	55.0437	2.05457	55.0437	3.23007	0.388277	-5.33094	7.33094	54.2827	55.8047
(Marton et al. 2019)*	200b	-200b	60	28	1	3.14286	7.42857	2.21154	7.42857	0.405741	0.417941	0.204747	1.79525	6.60941	8.24774
(Marton et al. 2019)*	200c	-200c	60	28	1	4.75	11.5	2.36957	11.5	0.613222	0.447806	-0.201916	2.20192	10.6223	12.3777
(Meng et al., 2015)	7	-7	66	180	1	50.2108	1.65519	45.2291	1.65519	6.18052	0.123371	-11.1138	13.1138	1.41339	1.897
(Meng et al., 2015)	16	-16	66	180	1	0.104409	0.893785	0.0747117	0.893785	0.0128518	0.0666188	0.97481	1.02519	0.763212	1.02436
(Meng et al., 2015)	25	-25	66	180	1	0.934115	0.443806	0.774199	0.443806	0.114982	0.0330793	0.774636	1.22536	0.37897	0.508641
(Meng et al., 2015)	93	-93	66	180	1	1.77352	0.575944	0.529156	0.575944	0.218305	0.0429283	0.572122	1.42788	0.491804	0.660083
(Meng et al., 2015)	182	-182	66	180	1	152.818	1.02811	123.999	1.02811	18.8106	0.0766311	-35.8688	37.8688	0.877917	1.17831
(Meng et al., 2015)	376	-376a	66	180	1	12.4915	1.39959	15.0718	1.39959	1.5376	0.104319	-2.0137	4.0137	1.19512	1.60405
(Meng et al., 2015)	429	-429	66	180	1	407.816	3.22992	377.525	3.22992	50.1986	0.240744	-97.3893	99.3893	2.75806	3.70178
(Meng et al., 2016)	200a	-200a	32	60	1	9.4326	3.39176	27.3769	1.57211	1.66746	0.437875	-2.26823	4.26823	2.53353	4.25
(Meng et al., 2016)	200b	-200b	32	60	1	8.27695	1.57211	8.01572	1.57211	1.46317	0.202958	-1.86782	3.86782	1.17431	1.96991
(Meng et al., 2016)	200c	-200c	32	60	1	8.12091	1.69737	11.7795	1.69737	1.43559	0.219129	-1.81375	3.81375	1.26788	2.12686
(Meng et al., 2016) EV	200a	-200a	32	163	1	4.63098	1.30794	3.9418	1.30794	0.81865	0.102446	-0.604553	2.60455	1.10715	1.50874
(Meng et al., 2016) EV	200b	-200b	32	163	1	4.71021	1.27717	3.88853	1.27717	0.832655	0.100036	-0.632004	2.632	1.0811	1.47324
(Meng et al., 2016) EV	200c	-200c	32	163	1	3.69937	1.14369	3.21799	1.14369	0.653963	0.089581	-0.281767	2.28177	0.968114	1.31927
(Paliwal et al. 2020)	21	-21	80	80	1	0.695652	1.69565	0.290598	1.69565	0.0777763	0.0324899	0.847558	1.15244	1.63197	1.75933
(Paliwal et al. 2020)	22	-22	80	80	1	0.212528	0.54698	0.319018	0.54698	0.0237613	0.0356673	0.953428	1.04657	0.477072	0.616888
(Ren et al 2018)	193	-193a-5p	40	45	1	16.963	0.355897	20.1937	0.355897	2.68209	3.0103	-4.2569	6.2569	-5.54429	6.25608
(Ritter et al. 2020) *	484	-484	32	15	1	0.995699	1.01598	1.02753	1.01598	0.176016	0.262326	0.655008	1.34499	0.501825	1.53014
(Song et al 2020)	21	-21	86	86	1	0.480297	1.85446	0.272816	1.85446	0.0517918	0.0294185	0.898488	1.10151	1.7968	1.91212
(Song et al 2020)	26	-26b	86	86	1	0.507331	0.780786	0.647073	0.780786	0.0547069	0.0697757	0.892774	1.10723	0.644026	0.917547
(Su et al. 2019) *	375	-375	50	50	1	1.30047	12.1063	16.5089	12.1063	0.183915	1.71208	0.639527	1.36047	8.75057	15.4619
(Su et al. 2019) *	1307	-1307	50	50	1	1.63209	6.21259	8.95046	6.21259	0.230813	0.878593	0.547606	1.45239	4.49055	7.93463
(Suryawanshi et al., 2013)* EAOC	15	-15b	20	35	1	18.5876	41.0981	0.833879	41.0981	4.15631	6.94685	-7.14638	9.14638	27.4823	54.7139
(Suryawanshi et al., 2013)* EAOC	16	-16	20	35	1	794.364	22412.3	52.718	22412.3	177.625	3788.36	-347.145	349.145	14987.1	29837.4
(Suryawanshi et al., 2013)* EAOC	191	-191	20	35	1	60.7824	615.664	7.36943	615.664	13.5914	104.066	-25.6391	27.6391	411.694	819.634
(Suryawanshi et al., 2013)* EAOC	195	-195	20	35	1	84.8619	463.685	31.4168	463.685	18.9757	78.377	-36.1924	38.1924	310.066	617.304
(Suryawanshi et al., 2013)* EAOC	1973	-1973	20	35	1	187.291	215.419	8.91724	215.419	41.8794	36.4124	-81.0837	83.0837	144.05	286.787
(Suryawanshi et al., 2013)* EAOC	1974	-1974	20	35	1	8.45702	42.8137	9.25829	42.8137	1.89105	7.23683	-2.70645	4.70645	28.6295	56.9979
(Suryawanshi et al., 2013)* EAOC	1979	-1979	20	35	1	144.337	274.184	12.19	274.184	32.2748	46.3455	-62.2585	64.2585	183.347	365.021
(Suryawanshi et al., 2013)* EAOC	4284	-4284	20	35	1	2.39607	17.6061	2.39607	17.6061	0.535778	2.97597	-0.0501251	2.05013	11.7732	23.439
(Suryawanshi et al., 2013)* SOC	15	-15b	20	35	1	18.5876	5.45546	0.808814	5.45546	4.15631	0.922141	-7.14638	9.14638	3.64806	7.26285
(Suryawanshi et al., 2013)* SOC	16	-16	20	35	1	794.364	1174.64	32.5358	1174.64	177.625	198.55	-347.145	349.145	785.48	1563.8
(Suryawanshi et al., 2013)* SOC	191	-191	20	35	1	60.7824	96.0025	4.03383	96.0025	13.5914	16.2274	-25.6391	27.6391	64.1968	127.808
(Suryawanshi et al., 2013)* SOC	195	-195	20	35	1	84.8619	132.606	11.2696	132.606	18.9757	22.4145	-36.1924	38.1924	88.6734	176.538
(Suryawanshi et al., 2013)* SOC	1973	-1973	20	35	1	187.291	54.5686	3.01398	54.5686	41.8794	9.22378	-81.0837	83.0837	36.49	72.6472
(Suryawanshi et al., 2013)* SOC	1974	-1974	20	35	1	8.45702	14.3801	3.0352	14.3801	1.89105	2.43068	-2.70645	4.70645	9.61595	19.1442
(Suryawanshi et al., 2013)* SOC	1979	-1979	20	35	1	144.337	92.1556	8.74991	92.1556	32.2748	15.5771	-62.2585	64.2585	61.6244	122.687
(Suryawanshi et al., 2013)* SOC	4284	-4284	20	35	1	2.39607	9.22149	1.16263	9.22149	0.535778	1.55872	-0.0501251	2.05013	6.16641	12.2766
(Todeschini et al., 2017)	32	-32-3p	65	168	1	1.67813	2.07053	2.41118	2.07053	0.208147	0.186027	0.592033	1.40797	1.70592	2.43514
(Todeschini et al., 2017)	483	-483-3p	65	168	1	0.429763	0.737135	0.587593	0.737135	0.0533056	0.0453338	0.895521	1.10448	0.64828	0.825989
(Todeschini et al., 2017)	574	-574-5p	65	168	1	0.672399	2.09943	1.8045	2.09943	0.0834008	0.13922	0.836534	1.16347	1.82656	2.3723
(Todeschini et al., 2017)	595	-595	65	168	1	0.887334	2.42839	2.96259	2.42839	0.11006	0.228569	0.784282	1.21572	1.9804	2.87638
(Todeschini et al., 2017)	1246	-1246	65	168	1	0.429763	3.34035	2.6627	3.34035	0.0533056	0.205432	0.895521	1.10448	2.93771	3.743
(Todeschini et al., 2017)	2287	-2278	65	168	1	0.249535	1.14076	0.411174	1.14076	0.030951	0.0317228	0.939336	1.06066	1.07859	1.20294
(Todeschini et al., 2017)	3148	-3148	65	168	1	1.4422	0.574349	0.609122	0.574349	0.178883	0.0469947	0.649389	1.35061	0.482239	0.666459
(Todeschini et al., 2017)	4281	-4281	65	168	1	1.02602	1.14076	1.30472	1.14076	0.127262	0.100661	0.750566	1.24943	0.943467	1.33806
(Todeschini et al., 2017)	4290	-4290	65	168	1	0.554544	0.547147	0.451318	0.547147	0.0687827	0.03482	0.865186	1.13481	0.4789	0.615394
(Wang et al 2019) plasma	10	-10a-5p	66	69	1	1.9	11.725	0.162047	11.725	0.233874	0.0195082	0.541607	1.45839	11.6868	11.7632
(Wang et al 2019) plasma	145	-145-5p	66	69	1	1.35922	3.48058	0.390516	3.48058	0.167309	0.0470126	0.672075	1.32793	3.38844	3.57273
(Wang et al 2019) plasma	205	-205a-5p	66	69	1	1.06475	8.7554	2.83155	8.7554	0.131061	0.340879	0.74312	1.25688	8.08727	9.42352
(Wang et al 2019) plasma	328	-328-3p	66	69	1	1.45724	3.85197	0.378309	3.85197	0.179373	0.0455431	0.648428	1.35157	3.76271	3.94124
(Wang et al 2019) plasma	346	-346	66	69	1	1.25	7.16837	0.174377	7.16837	0.153864	0.0209926	0.698426	1.30157	7.12722	7.20951
(Wang et al. 2019) serum	127	-127-3p	116	110	1	1.13615	3.50235	2.79625	3.50235	0.105489	0.266612	0.793242	1.20676	2.97979	4.02491
(Wang et al. 2019) serum	143	-143-3p	116	110	1	1.20408	3.46259	1.21218	3.46259	0.111796	0.115577	0.78088	1.21912	3.23605	3.68912
(Wang et al. 2019) serum	205	-205-5p	116	110	1	1.2	3.86471	0.613394	3.86471	0.111417	0.0584848	0.781622	1.21838	3.75008	3.97934
(Wang et al. 2019) serum	346	-346	116	110	1	1.22917	4.58333	0.287121	4.58333	0.114125	0.0273759	0.776314	1.22369	4.52968	4.63699
(Wang et al. 2019) serum	200c	-200c-3p	116	110	1	1.24026	4.88961	0.0889774	4.88961	0.115155	0.00848366	0.774296	1.2257	4.87298	4.90624
(Wang et al., 2022) *	320	-320d	168	161	1	392.647	3.70892	221.127	3.70892	30.2934	0.292304	-58.375	60.375	3.13601	4.28184
(Wang et al., 2022) *	4479	-4479	168	161	1	86.3408	3.26934	88.2828	3.26934	6.66134	0.25766	-12.0562	14.0562	2.76433	3.77436
(Wang et al., 2022) *	6763	-6763	168	161	1	879.098	3.53081	760.564	3.53081	67.8239	0.278267	-131.935	133.935	2.98541	4.07622
(Xu 2013)	21	-21	40	94	1	0.116059	0.762483	0.120354	0.762483	0.0183506	0.0124136	0.964033	1.03597	0.738153	0.786814
(Yokoi et al., 2017) *	26	-26a-5p	63	155	1	0.996967	1.00187	0.997896	1.00187	0.125606	0.0804724	0.753812	1.24619	0.844147	1.1596
(Yokoi et al., 2017) *	130	-130b-3p	63	155	1	0.99998	1.00007	0.999965	1.00007	0.125986	0.0803275	0.753068	1.24693	0.842627	1.15751
(Yokoi et al., 2017) *	142	-142-3p	63	155	1	0.992501	1.01129	0.996153	1.01129	0.125043	0.0812289	0.754915	1.24508	0.852084	1.1705
(Yokoi et al., 2017) *	328	-328-3p	63	155	1	0.998439	1	0.998956	1	0.125791	0.0803219	0.753449	1.24655	0.842569	1.15743
(Yokoi et al., 2017) *	374	-374a-5p	63	155	1	0.999837	1.00007	0.999847	1.00007	0.125968	0.0803275	0.753104	1.2469	0.842627	1.15751
(Yokoi et al., 2017) *	766	-766-3p	63	155	1	0.998561	1.00049	0.999439	1.00049	0.125807	0.0803609	0.753419	1.24658	0.842978	1.15799
(Yokoi et al., 2017) *	200a	-200a-3p	63	155	1	0.999809	1.00049	1.00048	1.00049	0.125964	0.0803609	0.75311	1.24689	0.842978	1.15799
(Yokoi et al., 2017) *	let7	Let-7d-5p	63	155	1	0.997971	1.00118	0.998488	1.00118	0.125733	0.0804166	0.753564	1.24644	0.843562	1.1588
(Zhang et al. 2019) *	93	-93-5p	30	30	1	1.17446	0.922742	1.17446	0.922742	0.214426	0.214426	0.579724	1.42028	0.502467	1.34302
(Zhang et al. 2019) *	99	-99b-5p	30	30	1	1.10191	0.986233	1.1487	0.986233	0.201179	0.209723	0.605688	1.39431	0.575176	1.39729
(Zhang et al. 2019) *	106	-106a-5p	30	30	1	1.57462	34.2255	1.49796	34.2255	0.287484	0.273489	0.436531	1.56347	33.6895	34.7615
(Zhang et al. 2019) *	122	-122-5p	30	30	1	1.10957	0.578344	1.03526	0.578344	0.202579	0.189013	0.602946	1.39705	0.207879	0.948809
(Zhang et al. 2019) *	185	-185-5p	30	30	1	1.15669	0.632878	1.06437	0.632878	0.211181	0.194327	0.586084	1.41392	0.251998	1.01376
(Zhang et al. 2019) *	let7	let-7d-5p	30	30	1	1.12896	0.934975	0.867539	0.934975	0.20612	0.15839	0.596005	1.40399	0.62453	1.24542
(Zheng et al., 2013) *	205	-205	70	134	1	1.13806	1.11729	1.2608	1.11729	0.136025	0.0965189	0.733392	1.26661	0.92811	1.30646
(Zheng et al., 2013) *	let7	Let-7f	200	360	1	1.2523	0.735603	1.29178	0.735603	0.0885511	0.0387697	0.82644	1.17356	0.659615	0.811592
(Zhu et al., 2016) *	125	-125b	54	135	1	1.47258	2.28311	5.4547	2.28311	0.200392	0.196499	0.607231	1.39277	1.89797	2.66825
(Zhu et al., 2022) *	205	-205	32	36	1	0.0421538	0.0489007	0.00738657	0.0489007	0.00745181	0.00815012	0.985394	1.01461	0.0329265	0.064875

## Sheet: Method extraction
Author	DOI:	Title	Study design	Nationality/ Ethnicity	Study population Cases	Sample size cases	Age Cases	Study population Controls	Sample size Controls	Age Controls	Plasma/serum	sample preparation	Storage before RNA extraction	RNA extraction method	Storage after RNA extraction	Processing method	Normalization	Hypothesis based / Hypothesis free	Anticoagulant	CA125 measurement	miRNA alone	CA125 alone	CA125 miRNA combined	HE4 measurement	HE4 alone	HE4 miRNA combined
(Ayaz et al., 2014)	10.3109/01443615.2014.919998	Circulating microRNA expression profiles in ovarian cancer	Case-control	Turkey	OC	18	58.88 ± 16.77	Healthy	24	53.73 ± 9.42	Plasma	Venepuncture, 3 mL, 4000rpm 15 min, within 2 h of collection, plasma transferred to a clean tube, 13000 rpm 5min	-80C	High Pure miRNA isolation kit, Roche	-80C	Array	Global mean	Hypothesis free	EDTA	ND	ND	ND	ND	ND	ND	ND
(Chen et al. 2020)	10.1080/21655979.2020.1736755	Serum miR-125b levels associated with epithelial ovarian cancer (EOC) development and treatment	Case-control	China	Epithelial ovarian cancer (EOC)	152	50.8	Healthy	42	ND	Serum	10mL peripheal blood, within 30 min centrifuged at 1500g for 10min. Serum were transferred to new tubes.	-80C	mirVana PARIS RNA isolation kit, Applied Biosystems	ND	Specific targeted qPCR	U6	Hypothesis based	EDTA-K2	Yes, used for ROC curves, both alone and i combination with investigated miRNA	AUC = 0.73	AUC = 0.68	AUC = 0.90	ND	ND	ND
(Choi et al. 2020)	10.1038/s41598-020-77068-0	Characterization of miR-200 family members as blood biomarkers for human and laying hen ovarian cancer	Case-control	United states, China	OC	118	(Median) 57	Healthy	112	(Median) 55	Serum, plasma, whole blood	2000 rpm 5 min.	ND	miRCURY RNA isolation Kit, Exiqon	-80C	Specific targeted qPCR	UniSp6	Hypothesis based	ND	ND	ND	ND	ND	ND	ND	ND
(Chung et al., 2013) *	10.1097/IGC.0b013e31828c166d	Detection of MicroRNA as Novel Biomarkers of Epithelial Ovarian Cancer From the Serum of Ovarian Cancer patient	Case-control	Korea	Epithelial ovarian cancer (EOC)	18	(Median) 57.5	Healthy	12	ND	Serum	centrifuged at 2500 rpm 15 min	-80C	TRIzol reagent, Invitrogen	ND	Array	Cel-miR-39 (spike-in in cDNA synthesis)	Hypothesis free	ND	Yes it was measured and used in characteristic table	ND	ND	ND	ND	ND	ND
(Cirillo et al. 2021)	10.1371/journal.pone.0255804	Multi-analytical test based on serum miRNAs and proteins quantification for ovarian cancer early detection	Case-control Biobank	United states, United Kingdom, Australia	Serous adenocarcinoma	training set: 25, validation 22	62.8 ± 13.7	Healthy	training set: 26, validation 42	48.6 ± 19.3	Serum	blood were centrifuged at 3000rpm 10 min. Serum were collecred and re-centrifuged at 16000g 10min	-80C	miRNeacy Serum/Plasma Advanced kit, Qiagen	-80C	Array	cel-miR-238-3p (spike-in prior to miRNA isolation)	Hypothesis free	ND	Yes, in combination with miRNA in ROC curves	AUC = 0.72	ND	AUC = 0.99	ND	ND	ND
(Elias et al., 2017)	10.7554/eLife.28932	Diagnostic potential for a serum miRNA neural network for detection of ovarian cancer	cohort	United States, Poland	Epithelial ovarian cancer (EOC)	Training: 135 Testing: 44	training 56 ± 8.1 Testing: 56 ± 8.3	ND	ND	ND	Serum	1 hr at room temperature (to clot), centrifugated 1300g 10 min	-80C	miRCURY RNA isolation Kit, Exiqon	ND	Sequencing, RT-qPCR validation	Global mean	Hypothesis free	ND	Yes, used for ROC curves	AUC = 0.93	AUC = 0.73	ND	ND	ND	ND
(Fitriawan et al 2020)	10.21315/mjms2020.27.6.4	Expression of Circulating MicroRNA-141 in Epithelial Ovarian Cancer	Case-control	Indonesia	Epithelial ovarian cancer (EOC)	30	47.73 ± 10.29	Healthy	25	44.48 ± 16.14	Plasma	Venepuncture, 5 ml, 1500 rpm 10 min, plasma was transferred to new tubes	-80C	miRCURY RNA isolation Kit, Exiqon	-80C	Specific targeted qPCR	miR-16	Hypothesis based	EDTA	Yes it was measured and used in characteristic table	ND	ND	ND	ND	ND	ND
(Gahlaw et al., 2022)	10.1038/s41416-022-01925-0	A novel circulating miRNA panel for non-invasive ovariancancer diagnosis and prognosis	Case-control	Germany	OC	100	60.3	Healthy	99	60.1	Plasma	1300g 20 min + 12000g 10min	-80C	NucleoSpin miRNA Plasma kit	ND	Specific targeted qPCR	Global mean	Hypothesis based	EDTA	Yes, used for ROC curves	ND	ND	AUC = 0.97	ND	ND	ND
(Gao & Wu, 2015)	10.1007/s13277-015-3138-3	MicroRNA-200c and microRNA-141 as potential diagnostic and prognostic biomarkers for ovarian cancer	Case-control	China	Epithelial ovarian cancer (EOC)	93	ND	Healthy Chinese Han females	50	ND	Serum	Venous blood	-80C	ND	ND	Specific targeted qPCR	ND	Hypothesis based	ND	Yes, used for ROC curves	AUC = 0.79, 0.75	ND	ND	ND	ND	ND
(Guo et al 2012)	10.1177/0300060513487652	Serum microRNA-92 expression in patients with ovarian epithelial carcinoma	Case-control	China	Epithelial ovarian cancer (EOC)	50	54.5 ± 2.4	Healthy, recruited from health check-up	50	51.4 ± 3.2	Serum	Venous blood 5 ml, after overnight fast, RT 1 h, centrifuged 1000g, 10min	-80C	miRNeasy RNA isolation kit, Qiagen	ND	Specific targeted qPCR	cel-miR-54	Hypothesis based	ND	ND	ND	ND	ND	ND	ND	ND
(Hannan et al., 2022)	10.1016/j.gore.2021.100894	Transcriptomic analysis of patient plasma reveals circulating miR200c as a potential biomarker for high-grade serous ovarian cancer	Case-control	Australia	HGSOC	14	62.9	Benign	15	63	Plasma	1000g 5 min	-80C	QIAmp Circulating Nucleic Acid Kit	-80C	Specific targeted qPCR	miR-191-5p	Hypothesis based	EDTA	ND	ND	ND	ND	ND	ND	ND
(Hashimoto et al. 2021)	10.1016/j.heliyon.2021.e07919	Preliminary evaluation of miR-1307-3p in human serum for detection of 13 types of solid cancer using microRNA chip	Case-control Biobank	Japan	Ovarian cancer	Training: 6 Validation: 7	Training: 57.9 ± 12.9 Validation: 59.5 ± 10.4	Non-cancer	Training: 6 Validation: 9	Training: 53.9 ± 13.3 Validation: 55.2 ± 11.5	Serum	ND (Biobank material)	ND	miRCURY RNA Extraction kit, Exiqon	ND	Array	ND	Hypothesis free	ND	ND	ND	ND	ND	ND	ND	ND
(Jeon et al., 2022)	10.3390/cimb44010021	Circulating Exosomal miR-1290 for Diagnosis of Epithelial Ovarian Cancer	Case-control	Korea	EOC	71	52.97	Benign	13	45.46	Serum	ND	ND	miRNeasy Mini Kit	ND	Specific targeted qPCR	RNU48	Hypothesis based	ND	Yes, used for ROC curves, both alone and i combination with investigated miRNA	AUC = 0.79	AUC = 0.78	AUC = 0.86	ND	ND	ND
(Ji et al., 2014) *	10.7314/APJCP.2014.15.4.1739	Differential microRNA Expression by Solexa Sequencing in the sera of ovarian cancer patients	Case-control	China	Ovarian carcinoma	31	ND	Healthy or benign	8 healthy 23 benign	ND	Serum	8 ml blood in serum tubes, 1 h room temperature, centrifuged 1800g 10 min. Alliqoutes 0.2ml	-80C	Qiagen Lysis solution + Omni-Mixer Homogenizer Qiagen kits	ND	Sequencing, RT-qPCR validation	miR-16	Hypothesis free	ND	Yes it was measured and used in characteristic table	ND	ND	ND	ND	ND	ND
(Kan et al., 2012) *	10.1186/1471-2407-12-627	Elevated levels of circulating microRNA-200 family members correlate with serous epithelial ovarian cancer.	Case-control Biobank	Australia	Serous epithelial ovarian cancer (SEOC)	28	63 ± 11	Healthy	28	64 ± 12	Serum	ND (Biobank material)	ND	miRVANA PARIS kit	ND	Array	SNORD7 (Z30) for cell lines No normalizer for serum miRNA	Hypothesis free	ND	Yes it was measured and used in characteristic table	ND	ND	ND	ND	ND	ND
(Kim et al. 2019)	10.7150/jca.30231	Serum exosomal miRNA-145 and miRNA-200c as promising biomarkers for preoperative diagnosis of ovarian carcinomas	Case-control	Korea	High grade serous ovarian cancer (HGSOC) og Non-HGSOC	HGSOC 39 Non-HGSOC 9	HGSOC 58.1 Non-SOC 43.7	Benign or borderline ovarian tumors (BOT)	10 benign 10 BOT	Benign 57.2 BOT 41.6	Serum	centrifuged at 3000rpm 15 min, 500uL aliquots	-80C	Before purification samples were centrifuged 2000g for 30 min to remove cellular debris. Total Exosome Isolation Reagent, Thermo Scientific. Western blotting follows exosome isolation. RNA were extracted from exosomes using TRIzol reagent, Invitrogen.	ND	Array	RNU48	Hypothesis free	ND	Yes, used for ROC curves, both alone and i combination with investigated miRNAs	AUC = 0.78, 0.87	AUC = 0.85	AUC = 0.87	ND	ND	ND
(Kobayashi et al. 2018)	10.1186/s13048-018-0458-0	Exosomal miR-1290 is a potential biomarker of high-grade serous ovarian carcinoma and can discriminate patients from those with malignancies of other histological types	retrospective cohort	Japan	Ovarian cancer	70	58 (median)	Healthy	13	34 (median)	Serum	centrifuged 1500g 10 min	-80C	miRNeacy Serum/Plasma Advanced kit, Qiagen	-80C	Array	cel-miR-39	Hypothesis free	ND	Yes, used for ROC curves, both alone and i combination with investigated miRNA	AUC = 0.48	AUC = 0.90	AUC = 0.92	ND	ND	ND
(Langhe et al. 2015)	10.1016/j.canlet.2014.10.010	A novel serum microRNA panel to discriminate benign from malignant ovarian disease	Case-control	Ireland	Serous ovarian carcinoa (SOC)	pilot: 5 SOC validation: 30 SOC	65	Benign	Pilot 5 benign Validation: 20 benign	58	Serum	Centrifuged 7500 rpm 10 min	-80C	centrifuged 3000g 5 min. Total RNA was extracted using miRNeasy mini kit, Qiagen	-80C	Array	Average of the assays	Hypothesis free	ND	ND	ND	ND	ND	ND	ND	ND
(Liu et al. 2021)	10.1186/s13048-021-00814-z	Plasma-derived exosomal miR-4732-5p is a promising noninvasive diagnostic biomarker for epithelial ovarian cancer	Case-control	Korea	Serous carcinoma ovarian cancer	Discovery: 6 Validation: 28	Discovery: 55.33 Validation: 60.11	Healthy	Discovery: 4 Validation: 20	Discovery: 52.75 Validation: 42.25	Plasma	Plasma collection not specified. EV prep: 2000g 10 min followed by polyethylene glycol (PEG)/dextran aqueous two-phase systems (ATPSs). 3000g 30 min - pellet used.	ND	EvRNA and plasma miRNA were isolated using miRCURY Exosome serum/plasma kit, Qiagen.	ND	Array	cel-miR-39	Hypothesis free	anticoagulant tubes	Yes it was measured and used in characteristic table	ND	ND	ND	ND	ND	ND
(Mahmoud et al., 2018)	10.22034/APJCP.2018.19.1.33	Serum MicroRNA-21 Negatively Relates to Expression of Programmed Cell Death-4 in Patients with Epithelial Ovarian cancer	case-control	Egypt	ovarian cancer	60	55.5 (median)	Healthy	30	ND	serum	4 ml venous blood centrifuged 5000rpg 10 min	-80C	miRNeasy mini kit, Qiagen	-70C	Array	U6	Hypothesis free	ND	ND	ND	ND	ND	ND	ND	ND
(Marton et al. 2019)	10.1016/j.jbiotec.2019.04.003	Circulating epithelial-mesenchymal transition-associated miRNAs are promising biomarkers in ovarian cancer	case-control	Hungary	Ovarian cancer	28	57.03 ± 9.56	Healthy	60	56.17 ± 12.18	Plasma	Venous blood 4*C max 2h, followed by two step centrifugation (2500g and 16000g) 10 min	-80C	miRNeacy Serum/Plasma Advanced kit, Qiagen	ND	Specific targeted qPCR	miR-103-3p	Hypothesis based	EDTA	Yes used for Cohen's kappa values	ND	ND	ND	Yes used for Cohen's kappa values	ND	ND
(Meng et al., 2015)	10.1038/bjc.2015.340	Diagnostic and prognostic potential of serum miR-7, miR-16, miR-25, miR-93, miR-182, miR-376a and miR-429 in ovarian cancer patients	Case-control	Germany	Epithelial ovarian cancer (EOC)	180	60	Healthy	66	59	Serum	ND	ND	NucleoSpin miRNA Plasma kit, Macherey-Nagel	ND	Array	miR-484	Hypothesis free	ND	Yes, used for ROC curves, both alone and i combination with investigated miRNA	AUC = 0.70	AUC = 0.82	AUC = 0.83	ND	ND	ND
(Meng et al., 2016)	10.1007/978-3-319-42044-8_1	Circulating Cell-Free miR-373, miR-200a, miR-200b and miR-200c in Patients with Epithelial Ovarian cancer	Case-control	Germany	Epithelial ovarian cancer (EOC)	60	56 (median)	Healthy Benign	Healthy 32 Benign 20	Healthy 56 (median) Benign 46 (median)	Serum	ND	ND	mirVana PARIS kit, Life Technologies	ND	Array	miR-484	Hypothesis free	ND	ND	ND	ND	ND	ND	ND	ND
(Meng et al., 2016) EV	10.18632/oncotarget.7850	Diagnostic and prognostic relevance of circulating exosomal miR-373, miR-200a, miR-200b and miR-200c in patients with epithelial ovarian cancer	Case-control	Germany	Epithelial ovarian cancer (EOC)	163	60 (median)	Healthy Benign	Healthy 32 Benign 20	Healthy 56 (median) Benign 46 (median)	Serum	Blood collection protocol not disclosed. Exosomes isolated from serum by Total Exosome Isolation Reagent for Serum, Life Technologies	ND	EvRNA was extracted with mirVana PARIS kit, Life Technologies	ND	Array	miR-484	Hypothesis free	ND	Yes it was measured and used in characteristic table	ND	ND	ND	ND	ND	ND
(Oliveira et al., 2019)	10.1371/journal.pone.0225249	Diagnostic plasma miRNA-profiles for ovarian cancer in patients with pelvic mass	Case-control	Denmark	Ovarian cancer	Discovery: 95 Validation: 95	Discovery: 64 (median) Validation: 66 (median)	Benign	Discovery: 95 Validation: 95	Discovery: 66 (median) Validation: 51 (median)	Plasma	ND	ND	Norgen Total RNA purification kit, Norgen	ND	Array	average of Ct of cel-miR-54 and cel-miR-238	Hypothesis free	ND	Yes, used for ROC curves, both alone and i combination with investigated miRNA	AUC = 0.82	AUC = 92	AUC = 0.96	ND	ND	ND
(Paliwal et al. 2020)	10.1007/s13205-020-2124-7	Evaluation of miR‑22 and miR‑21 as diagnostic biomarkers in patients with epithelial ovarian cancer	Case-control	India	Epithelial ovarian cancer (EOC)	80	ND	healthy	80	ND	Serum	4500 rpm 15 min	-80C	mirVana microRNA isolation kit	-80C	Array	ND	Hypothesis free	ND	ND	ND	ND	ND	ND	ND	ND
(Penyige et al., 2019)	10.3390/ijms20184533	Circulating miRNA Profiling in Plasma Samples of Ovarian Cancer Patients	Case-control	Hungary	Serous ovarian cancer (SOC)	18	ND	Healthy	6	ND	Plasma	9mL venous blood 4*C max 2h, followed by two step centrifugation (2500g and 16000g) 10 min	-80C	miRNeasy Serum/plasma RNA isolation kit, Qiagen	ND	Specific targeted qPCR	hsa-miR-103-3p	Hypothesis based	EDTA	ND	ND	ND	ND	ND	ND	ND
(Ren et al 2018)	10.1007/s12253-018-0392-x	Diagnostic model of serum miR-193-5p, HE5 and CA125 improves the diagnostic efficacy of epithelium ovarian cancer	Case.control	China	Epithelial ovarian cancer (EOC)	45	56	Healthy Benign	Healthy 40 Benign 30	Healthy 54 Benign 53	serum	1000 rpm 10 min	-80C	Serum RNA extraction kit, Life Techonologies	-80C	Specific targeted qPCR	cel-mir-39	Hypothesis based	ND	Yes, used for ROC curves, both alone and i combination with investigated miRNA	AUC = 0.71	AUC = 0.90	AUC = 0.996	Yes it was measured and used in ROC curve alone	AUC = 0.88	ND
(Resnick et al., 2009)	10.1016/j.ygyno.2008.08.036	The detection of differentially expressed microRNAs from the serum of ovarian cancer patients using a novel real-time PCR platform	Case-control	United States	Ovarian cancer	28	57 (Median)	Healthy	15	ND	Serum	ND	-80C	TriReagent BD	ND	Array	snRNAs U44 and U48	Hypothesis free	ND	Yes it was measured and used in characteristic table	ND	ND	ND	ND	ND	ND
(Ritter et al. 2020)	10.3233/CBM-190575	Discovery of potential serum and urine-based microRNA as minimally-invasive biomarkers for breast and gynecological cancer	Case-control	Germany	Ovarian cancer (endometriod cancer, breast cancer)	Discovery: 5 Validation:15	Discovery: 61 Validation: 63	Healthy	Discovery: 10 Validation:62	ND	Serum	Wholeblood incubated 20 min at RT, centrifuged 3500rpm 10 min	-20C	Norgen Total RNA purification kit, Norgen	ND	ND	geometric mean	ND	ND	ND	ND	ND	ND	ND	ND	ND
(Savolainen et al. 2020)	10.1186/s13104-020-05155-6	Expression of the miR‑200 family in tumor tissue, plasma and urine of epithelial ovarian cancer patients in comparison to benign counterparts	Case-control	Finland	High grade serous ovarian cancer (HGSOC)	9	ND	Benign	7	ND	Plasma	2000g 10min	-80C	NucleoSpin miRNA Plasma kit, Macherey-Nagel GmbH	ND	Specific targeted qPCR	cel-miR-39	Hypothesis based	EDTA	A CA12-5 were measured	ND	ND	ND	Yes	ND	ND
(Shapira et al., 2014)	10.1038/bjc.2013.795	Circulating biomarkers for detection of ovarian cancer and predicting cancer outcomes	Case-control	United States	Serous epithelial ovarian cancer (SEOC)	42	64	Healthy Benign	Healthy 23 Benign 36	Healthy 36 Benign 52	Plasma	Within 5h of venipuncture, samples were centrifuged at 4000 rpm 10 min at RT. Followed by 100.000g for 1h to remove cell debris, microvessicles and exosomes.	-80C	mirVana PARIS kit, Ambion	ND	Array	miR-320, -720, -1274b, and U6 RNA	Hypothesis free	EDTA	ND	ND	ND	ND	ND	ND	ND
(Song et al 2020)	10.26355/eurrev_202002_20344	Diagnistic significance of serum miR-26b and miR-21 expressions in ovarian cancer and their associations with clinicopathological characteristics and prognosis of patients.	Case-control	China	Ovarian cancer	86	46.1 ± 2.8	Healthy	86	46.8 ± 2.6	Serum	3 ml from fasting participants, stored in vacuum drying tubes and centrifuged at 3000 rpm for 10 min.	-80C	TRIzol kit, Invitrogen	ND	Array	ND	Hypothesis free	ND	ND	ND	ND	ND	ND	ND	ND
(Su et al. 2019)	10.1186/s13048-018-0477-x	Upregulated expression of serum exosomal miR-371 and miR-1207 enhance the diagnostic power of CA125 for ovarian cancer	Case-control	China	Ovarian cancer	50	49 (median)	Healthy Benign	Healthy 50 Benign 50	49 (median)	Serum	Blood collection protocol not disclosed. Exosomes isolated from serum by Total Exosome Isolation Reagent, Invitrogen	-80C	EvRNA was extracted using TRIzol Reagent, Invitrogen	ND	Specific targeted qPCR	ND	Hypothesis based	ND	Yes, used for ROC curves, both alone and i combination with investigated miRNAs	AUC = 0.694, 0.788	AUC = 0.906	AUC = 0.874	Yes, used for ROC curves, both alone and i combination with investigated miRNAs	AUC = 0.82	AUC = 0.977
(Suryawanshi et al., 2013)	10.1158/1078-0432.CCR-12-2726	Plasma microRNAs as novel biomarkers for endometriosis and endometriosis-associated ovarian cancer	Case-control	United States	Endometriosis-associated ovarian cancer (EAOC)	14	ND	Healthy and serous ovarian cancer (SOC)	Healthy 20 SOC 21	ND	Plasma	Peripheral blood was drawn in heparinized tubes, and within 8h from collection the tubes were centrifuged at 2300 rpm for 20 min	-80C	mirVana miRNA isolation kit, Life Technologies	ND	Specific targeted qPCR	ND	Hypothesis based	heparinized tubes	ND	ND	ND	ND	ND	ND	ND
(Todeschini et al., 2017)	10.1016/j.canlet.2016.12.017	Circulating miRNA landscape identifies miR-1246 as promising diagnostic biomarker in high-grade serous ovarian carcinoma: A validation across two independent cohorts	Case-control	Italy	High-grade serous ovarian carcinoma (HGSOC)	Training set: 110 Validation set: 58	Training set: 61 Validation set: 57 (median ages)	Healthy	Training set: 52 Validation set: 13	Training ste: 61 Validation set: 52 (median ages)	Serum	ND	ND	miRNeasy mini kit, Qiagen	ND	ND	No normalizers, analysis done on raw cycle thresholds	ND	ND	Yes it was measured and used in characteristic table	ND	ND	ND	ND	ND	ND
(Wang et al 2019) plasma	10.1016/j.amjms.2019.07.005	Value of Plasma-Based MicroRNAs as Diagnostic Biomarkers for Ovarian cancer	Case-control	China	Ovarian cancer	Training: 32 Validation: 69	ND	Healthy	Training: 34 Validation: 66	ND	Plasma	5 mL venous blood. Centrifuged at 1500 rcf 10 min followed by 12.000 rcf 2 min, all within 12h of collection	-80C	mirVana Paris kit, Ambion	-80C	Specific targeted qPCR	cel-miR-39	Hypothesis based	ND	Yes	ND	ND	ND	ND	ND	ND
(Wang et al. 2019) serum	10.1016/j.eurox.2019.100017	Five serum microRNAs for detection and predicting of ovarian cancer	Case-control	China	Ovarian cancer	Training: 30 Validation: 80	ND	Healthy	Training: 36 Validation: 80	ND	Serum	Centrifuged at 1500 rcf 10 min followed by 12.000 rcf 2 min, all within 12h of collection	-80C	mirVana Paris kit, Ambion	-80C	Specific targeted qPCR	cel-miR-39	Hypothesis based	ND	Yes it was measured and used in characteristic table	ND	ND	ND	ND	ND	ND
(Wang et al. 2022)	10.3389/fonc.2022.986343	Plasma exosomal miR-320d, miR-4479, and miR-6763-5p as diagnostic biomarkers in epithelial ovarian cancer	Case-control	China	Epithelial ovarian cancer (EOC)	166	ND	Healthy	173	ND	Plasma	2000g 10min + 12000g, 4C 10 min	-80C	Trizol	ND	Sequencing, RT-qPCR validation	U6	Hypothesis free	ND	Yes it was measured and used in characteristic table	ND	ND	ND	Yes it was measured and used in characteristic table	ND	ND
(Xu et al., 2013)	10.7314/APJCP.2013.14.2.1057	Identification of Serum MicroRNA-21 as a Biomarker for Early Detection and Prognosis in Human Epithelial Ovarian Cancer	Case-control	China	Epithelial ovarian cancer (EOC)	94	59.2 ± 6.8	healthy	40	ND	Serum	5000 rpm 10 min	-80C	mirVana kit, Ambion	ND	Array	U6	Hypothesis free	ND	ND	ND	ND	ND	ND	ND	ND
(Yokoi et al., 2017)	10.18632/oncotarget.20688	A combination of circulating miRNAs for the early detection of ovarian cancer	Case-control + Biobank	Japan	Ovarian cancer	155	54.1	Healthy	63	54.1	Serum	ND	ND	QIAzol and the miRNeasy Mini Kit, Qiagen	ND	Sequencing, RT-qPCR validation	miR-16	Hypothesis free	ND	Yes, in combination with miRNA in ROC curves	AUC = 0.968	ND	AUC = 0.993	ND	ND	ND
(Yokoi et al., 2018)	10.1038/s41467-018-06434-4	Intrgrated extracellular microRNA profiling for ovarian cancer screening	Case-control	Japan	Ovarian cancer	Discovery: 160 Validation: 160	Discovery: 56.8 ± 11.5 Validation: 57.1 ± 11.6	Healthy	Discovery: 1379 Validation: 1380	ND	Serum	ND	1 week at 4C followed by -20C	3D-Gene RNA extraction reagent, Toray Industries.	ND	Array	miR-149-3p, miR-2861, and miR-4463	Hypothesis free	ND	ND	ND	ND	ND	ND	ND	ND
(Zhang et al. 2019)	10.3892/ol.2019.10220	MicroRNA profiling of plasma exosomes from patients with ovarian cancer using high-throughput sequencing	Case-control	China	Ovarian cancer	30	53.34±2.34	Healthy	30	52.67±3.21	Plasma	Fasting blood (10ml) centrifuged 2000g 10 min	-80C	EvRNA was extracted using Rneasy Mini Spin kit, Qiagen. Plasma RNA was extracted using miRNeasy Serum/plasma kit, Qiagen	ND	Sequencing, RT-qPCR validation	cel-miR-39 (median(	Hypothesis free	EDTA	ND	ND	ND	ND	ND	ND	ND
(Zheng et al., 2013)	10.1371/journal.pone.0077853	Plasma miRNAs as Diagnostic and Prognostic Biomarkers for Ovarian Cancer	Case-control	China	Epithelial ovarian cancer (EOC)	Training: 76 Validation I: 134 Validation II: 150	Training: 56.51 ± 11.57 Validation I: 53.75 ± 10.25 Validation II: 53.22 ± 10.38	Healthy	Training: 30 Validation I: 70 Validation II: 100	ND	Plasma	1200g 10 min	-80C	miRNeasy mini kit, Qiagen	ND	Array	Cel-miR-39	Hypothesis free	EDTA	Yes it was measured and used in characteristic table	ND	ND	ND	ND	ND	ND
(Zhu et al., 2017)	10.1097/IGC.0000000000000846	A pilot study of circulating microRNA-125b as a diagnostic and pronostic biomarker for Epithelial ovarian cancer	Case-control	China	Epithelial ovarian cancer (EOC)	135	54 (median)	Benign	54	55 (median)	Serum	10ml fasting wholeblood left standing at RT for 1h, then centrifuged 2500g 15 min	-80C	miRNeasy micro kit, Qiagen	ND	Array	miR-16	Hypothesis based	ND	ND	ND	ND	ND	ND	ND	ND
(Zhu et al., 2022)	10.1186/s13048-022-00961-x	Detection of plasma exosomal miRNA-205 as a biomarker for early diagnosis and an adjuvant indicator of ovarian cancer staging	Case-control	China	OC	36	ND	Healthy	32	ND	Plasma	3500rpm 10min 4C	-80C	Multi-type Sample DNA/RNA Extraction-Purification kit	-80C	Specific targeted qPCR	U6	Hypothesis based	EDTA	Yes, used for ROC curves, both alone and i combination with investigated miRNA	0.72	AUC = 0.92	AUC = 0.93 CA125-HE4: 0.95	Yes, used for ROC curves, both alone and i combination with investigated miRNA	AUC = 0.78	AUC = 0.83
(Zuberi et al., 2015)	10.1007/s12094-015-1303-1	Expression o fserum miR-200a, miR-200b, miR-200c as candidate biomarkers in epithelial ovarian cancer and their association with clinicopathological features	Case-control	India	Epithelial ovarian cancer (EOC)	70	ND	Healthy	70	ND	Serum	1500g	-70C	Trizol	-70C	Specific targeted qPCR	U6	Hypothesis based	ND	Yes it was measured and used in characteristic table	ND	ND	ND	ND	ND	ND
(Zuberi et al., 2016)	10.1007/s13277-016-4993-2	The conglomeration of diagnostic, prognostic and therapeutic potential of serum-199a and its association with clinicopathological features in epithelial ovarian cancer	Case-control	India	Epithelial ovarian cancer (EOC)	70	ND	Healthy	70	ND	Serum	1500g	-70C	Trizol	-70C	Specific targeted qPCR	U6	Hypothesis based	ND	Yes it was measured and used in characteristic table	ND	ND	ND	ND	ND	ND
(Zuberi et al., 2016)	10.1371/journal.pone.0153902	Utility of Serum miR-125b as a diagnostic and prognostic indicator and its alliance with a panel of tumor suppressor genes in epithelial ovarian cancer	Case-control	India	Epithelial ovarian cancer (EOC)	70	ND	Healthy	70	ND	Serum	1500g	-70C	Trizol	-70C	Specific targeted qPCR	U6	Hypothesis based	ND	Yes it was measured and used in characteristic table	ND	ND	ND	ND	ND	ND

## Sheet: Not extractable data
Study	miRNA	miRNA	N C	N OC
(Cirillo et al. 2021)	141	-141-3p	37	25
(Cirillo et al. 2021)	320	-320b	37	25
(Elias et al., 2017)	29	-29a-3p	113	113
(Elias et al., 2017)	92	-92a-3p	113	113
(Elias et al., 2017)	320	-320c	113	113
(Elias et al., 2017)	335	-335-5p	113	113
(Elias et al., 2017)	450	-450b-5p	113	113
(Elias et al., 2017)	1307	-1307-5p	113	113
(Elias et al., 2017)	200c	-200c-3p	113	113
(Fitriawan et al 2020)	141	-141	25	30
(Gahlaw et al., 2022)	92	-92a	99	100
(Gahlaw et al., 2022)	200	-200c	99	100
(Gahlaw et al., 2022)	320	-320b	99	100
(Gahlaw et al., 2022)	335	-335	99	100
(Gahlaw et al., 2022)	375	-375	99	100
(Gahlaw et al., 2022)	486	-486	99	100
(Guo et al 2012)	92	-92	50	50
(Kan et al., 2012)	200a	-200a-3p	28	28
(Kan et al., 2012)	200b	-200b-3p	28	28
(Kan et al., 2012)	200c	-200c-3p	28	28
(Oliveira et al., 2019)	21	-21-5p	95	95
(Oliveira et al., 2019)	195	-195-5p	95	95
(Oliveira et al., 2019)	221	-221-3p	95	95
(Oliveira et al., 2019)	451	-451a	95	95
(Oliveira et al., 2019)	484	-484	95	95
(Oliveira et al., 2019)	200c	-200c-3p	95	95
(Penyige et al., 2019)	19	-19b-3p	6	18
(Penyige et al., 2019)	23	-23a-3p	6	18
(Penyige et al., 2019)	25	-25-3p	6	18
(Penyige et al., 2019)	26	-26b-5p	6	18
(Penyige et al., 2019)	125	-125a-3p	6	18
(Penyige et al., 2019)	128	-128-2-5p	6	18
(Penyige et al., 2019)	144	-144-3p	6	18
(Penyige et al., 2019)	146	-146b-5p	6	18
(Penyige et al., 2019)	148	-148b-3p	6	18
(Penyige et al., 2019)	149	-149-5p	6	18
(Penyige et al., 2019)	219	-219a-2-3p	6	18
(Penyige et al., 2019)	223	-223-3p	6	18
(Penyige et al., 2019)	301	-301a-3p	6	18
(Penyige et al., 2019)	325	-325	6	18
(Penyige et al., 2019)	331	-331-3p	6	18
(Penyige et al., 2019)	331	-331-5p	6	18
(Penyige et al., 2019)	337	-337-5p	6	18
(Penyige et al., 2019)	409	-409-3p	6	18
(Penyige et al., 2019)	497	-497-5p	6	18
(Penyige et al., 2019)	498	-498	6	18
(Penyige et al., 2019)	500	-500a-5p	6	18
(Penyige et al., 2019)	513	-513a-3p	6	18
(Penyige et al., 2019)	520	-520g-3p	6	18
(Penyige et al., 2019)	526	-526a	6	18
(Penyige et al., 2019)	548	-548h-3p	6	18
(Penyige et al., 2019)	552	-552-3p	6	18
(Penyige et al., 2019)	553	-553	6	18
(Penyige et al., 2019)	584	-584-5p	6	18
(Penyige et al., 2019)	590	-590-5p	6	18
(Penyige et al., 2019)	613	-613	6	18
(Penyige et al., 2019)	615	-615-5p	6	18
(Penyige et al., 2019)	625	-625-5p	6	18
(Penyige et al., 2019)	628	-628-5p	6	18
(Penyige et al., 2019)	651	-651-5p	6	18
(Penyige et al., 2019)	1185	-1185-1-3p	6	18
(Penyige et al., 2019)	1185	-1185-2-3p	6	18
(Penyige et al., 2019)	1197	-1197	6	18
(Penyige et al., 2019)	1266	-1266-5p	6	18
(Penyige et al., 2019)	1281	-1281	6	18
(Penyige et al., 2019)	1305	-1305	6	18
(Penyige et al., 2019)	1976	-1976	6	18
(Penyige et al., 2019)	3161	-3161	6	18
(Penyige et al., 2019)	3615	-3615	6	18
(Penyige et al., 2019)	4455	-4455	6	18
(Resnick et al., 2009)	21	-21	15	28
(Resnick et al., 2009)	29	-29a-3p	15	28
(Resnick et al., 2009)	92	-92	15	28
(Resnick et al., 2009)	93	-93	15	28
(Resnick et al., 2009)	99	-99b	15	28
(Resnick et al., 2009)	126	-126	15	28
(Resnick et al., 2009)	127	-127	15	28
(Resnick et al., 2009)	155	-155	15	28
(Savolainen et al. 2020)	200a	-200a	7	9
(Savolainen et al. 2020)	200b	-200b	7	9
(Savolainen et al. 2020)	200c	-200c	7	9
(Shapira et al., 2014)	16	-16	23	42
(Shapira et al., 2014)	17	-17	23	42
(Shapira et al., 2014)	19	-19b	23	42
(Shapira et al., 2014)	20	-20a	23	42
(Shapira et al., 2014)	24	-24	23	42
(Shapira et al., 2014)	30	-30a	23	42
(Shapira et al., 2014)	30	-30b-5p	23	42
(Shapira et al., 2014)	30	-30c	23	42
(Shapira et al., 2014)	92	-92a	23	42
(Shapira et al., 2014)	106	-106a	23	42
(Shapira et al., 2014)	106	-106b	23	42
(Shapira et al., 2014)	126	-126	23	42
(Shapira et al., 2014)	146	-146a	23	42
(Shapira et al., 2014)	150	-150	23	42
(Shapira et al., 2014)	191	-191	23	42
(Shapira et al., 2014)	193	-193a-5p	23	42
(Shapira et al., 2014)	223	-223	23	42
(Shapira et al., 2014)	320	-320	23	42
(Shapira et al., 2014)	328	-328	23	42
(Shapira et al., 2014)	625	-625	23	42
(Shapira et al., 2014)	720	-720	23	42
(Shapira et al., 2014)	1274	-1274a	23	42
(Yokoi et al., 2018)	211	-211-3p	1380	160
(Yokoi et al., 2018)	658	-658	1380	160
(Yokoi et al., 2018)	939	-939-5p	1380	160
(Yokoi et al., 2018)	1268	-1268b	1380	160
(Yokoi et al., 2018)	1273	-1273g-3p	1380	160
(Yokoi et al., 2018)	3663	-3663-3p	1380	160
(Yokoi et al., 2018)	4687	-4687-3p	1380	160
(Yokoi et al., 2018)	4745	-4745-5p	1380	160
(Yokoi et al., 2018)	5739	-5739	1380	160
(Zuberi et al 2015)	200a	-200a-3p	70	70
(Zuberi et al 2015)	200b	-200b-3p	70	70
(Zuberi et al 2015)	200c	-200c-3p	70	70
(Zuberi et al., 2016)	125	-125b	70	70
(Zuberi et al., 2016)	199	-199a	70	70

## Sheet: NOS criteria
	Criteria no.	Newcastle-Ottawa quality assessment scale
	Selection
	1A	Is the case definition adequate?
		Yes, with independent validation *
		Yes, e.g. record linkage or based on self-reports
		No description
	1B	Representativeness of the cases
		Consecutive or representative series of cases *
		Potential for selection biases or not stated
	1C	Selection of Controls
		Community controls *
		Hospital controls
		No description
	1D	Definition of Controls
		No history of the disease (endpoint) *
		No description of the source
	Comparability
	2A	Comparability of cases and controls based on the design or analysis
		Study controls for age. *
	Method
	3A	Same method of ascertainment for miRNA for cases and controls
		Yes *
		No
	3B	Hypothesis approach for miRNA selection
		Hypothesis free *
		Hypothesis-driven
	3C	Normalizing data
		A normalization method with internal marker, chosen miRNA, global mean *
		Normalization using Spike-ins alone
		Normalization method not indicated

## Sheet: NOS estimates
	Study	NOS Criteria								Total points	Part of meta-analysis	Total observations	Sum of criteria fulfilled	% fulfilling NOS	% not fulfilling NOS
		1A	1B	1C	1D	2A	3A	3B	3C
	(Jeon et al., 2022)	0	1	0	0	1	1	0	0	3	No	8	3	37.5	62.5
	(Ren et al 2018)	0	1	0	1	0	1	0	0	3	No	8	3	37.5	62.5
	(Chen et al. 2020)	1	0	0	1	1	1	0	0	4	Yes	8	4	50	50
	(Choi et al. 2020)	1	0	0	1	1	1	0	0	4	Yes	8	4	50	50
	(Hashimoto et al. 2021)	1	0	1	0	1	1	0	0	4	No	8	4	50	50
	(Savolainen et al. 2020)	1	1	0	1	0	1	0	0	4	No	8	4	50	50
	(Su et al. 2019)	1	1	0	1	0	1	0	0	4	No	8	4	50	50
	(Cirillo et al. 2021)	1	1	0	1	0	1	1	0	5	No	8	5	62.5	37.5
	(Fitriawan et al 2020)	1	1	0	1	1	1	0	0	5	No	8	5	62.5	37.5
	(Gahlaw et al., 2022)	1	0	0	1	1	1	0	1	5	No	8	5	62.5	37.5
	(Gao & Wu, 2015)	1	1	1	1	0	1	0	0	5	Yes	8	5	62.5	37.5
	(Hannan et al., 2022)	1	1	0	0	1	1	0	1	5	Yes	8	5	62.5	37.5
	(Kobayashi et al. 2018)	1	1	0	1	0	1	1	0	5	No	8	5	62.5	37.5
	(Langhe et al. 2015)	1	0	0	1	0	1	1	1	5	No	8	5	62.5	37.5
	(Song et al 2020)	0	1	0	1	1	1	1	0	5	Yes	8	5	62.5	37.5
	(Todeschini et al., 2017)	1	1	0	1	1	1	0	0	5	No	8	5	62.5	37.5
	(Wang et al 2019) plasma	1	1	0	1	1	1	0	0	5	Yes	8	5	62.5	37.5
	(Zhu et al., 2017)	1	1	0	1	0	1	0	1	5	Yes	8	5	62.5	37.5
	(Zuberi et al., 2016)	1	1	0	1	0	1	0	1	5	No	8	5	62.5	37.5
	(Chung et al., 2013) *	1	1	1	1	0	1	1	0	6	Yes	8	6	75	25
	(Guo et al 2012)	1	1	1	1	0	1	0	1	6	No	8	6	75	25
	(Kim et al. 2019)	1	1	1	1	0	1	1	0	6	Yes	8	6	75	25
	(Liu et al. 2021)	1	1	0	1	0	1	1	1	6	No	8	6	75	25
	(Marton et al. 2019)	1	1	0	1	1	1	0	1	6	Yes	8	6	75	25
	(Meng et al., 2016)	0	1	1	1	0	1	1	1	6	Yes	8	6	75	25
	(Oliveira et al., 2019)	1	1	1	1	0	1	1	0	6	No	8	6	75	25
	(Penyige et al., 2019)	1	1	0	1	0	1	1	1	6	No	8	6	75	25
	(Resnick et al., 2009)	1	1	1	1	0	1	0	1	6	No	8	6	75	25
	(Shapira et al., 2014)	1	1	0	1	0	1	1	1	6	No	8	6	75	25
	(Suryawanshi et al., 2013)	1	1	1	1	0	1	0	1	6	No	8	6	75	25
	(Wang et al. 2019) serum	1	1	0	1	1	1	1	0	6	Yes	8	6	75	25
	(Wang et al. 2022)	1	1	0	1	1	1	1	0	6	No	8	6	75	25
	(Xu et al., 2013)	1	1	0	1	1	1	1	0	6	Yes	8	6	75	25
	(Yokoi et al., 2017)	1	1	0	1	0	1	1	1	6	Yes	8	6	75	25
	(Zheng et al., 2013)	1	1	0	1	1	1	1	0	6	Yes	8	6	75	25
	(Zhu et al., 2022)	1	1	0	1	1	1	0	1	6	Yes	8	6	75	25
	(Zuberi et al., 2016)	1	1	1	1	1	1	0	0	6	No	8	6	75	25
	(Ayaz et al., 2014)	1	1	0	1	1	1	1	1	7	Yes	8	7	87.5	12.5
	(Elias et al., 2017)	1	1	0	1	1	1	1	1	7	No	8	7	87.5	12.5
	(Meng et al., 2015)	1	1	0	1	1	1	1	1	7	Yes	8	7	87.5	12.5
	(Meng et al., 2016) EV	0	1	1	1	1	1	1	1	7	Yes	8	7	87.5	12.5
	(Paliwal et al. 2020)	1	1	1	1	1	1	1	0	7	Yes	8	7	87.5	12.5
	(Ritter et al. 2020)	1	1	0	1	1	1	1	1	7	No	8	7	87.5	12.5
	(Zhang et al. 2019)	1	1	1	1	1	1	1	0	7	Yes	8	7	87.5	12.5
	(Zuberi et al., 2015)	1	1	1	1	1	1	0	1	7	No	8	7	87.5	12.5
	(Ji et al., 2014) *	1	1	1	1	1	1	1	1	8	Yes	8	8	100	0
	(Kan et al., 2012) *	1	1	1	1	1	1	1	1	8	No	8	8	100	0
	(Mahmoud et al., 2018)	1	1	1	1	1	1	1	1	8	Yes	8	8	100	0
	(Yokoi et al., 2018)	1	1	1	1	1	1	1	1	8	No	8	8	100	0

## Sheet: Circle diagram
	Author	miRNA	Count											miRNA	Count
	(Meng et al., 2015)	7	1		83	miRNAs in 1 study								7	1
	(Wang et al 2019) plasma	10	1		22	miRNAs in 2 studies								10	1
	(Suryawanshi et al., 2013)* SOC	15	1		14	miRNAs in 3 studies								15	1
	(Suryawanshi et al., 2013)* EAOC	15			4	miRNAs in 4 studies								17	1
	(Suryawanshi et al., 2013)* SOC	16	3		3	miRNAs in 5 studies								23	1
	(Suryawanshi et al., 2013)* EAOC	16			2	miRNAs in 6 studies								27	1
	(Shapira et al., 2014)	16			2	miRNAs in 7 studies								32	1
	(Meng et al., 2015)	16			1	miRNAs in 8 studies								122	1
	(Shapira et al., 2014)	17	1		1	miRNAs in 13 studies								128	1
	(Shapira et al., 2014)	19	3											130	1
	(Penyige et al., 2019)	19												132	1
	(Ayaz et al., 2014)	19												142	1
	(Ayaz et al., 2014)	19												144	1
	(Shapira et al., 2014)	20	2											148	1
	(Ayaz et al., 2014)	20												149	1
	(Song et al 2020)	21	7											155	1
	(Xu 2013)	21												182	1
	(Resnick et al., 2009)	21												185	1
	(Paliwal et al. 2020)	21												199	1
	(Oliveira et al., 2019)	21												205	1
	(Mahmoud, Fawzy, & A Elshimy, 2018)	21												206	1
	(Kim et al. 2019)*	21												211	1
	(Paliwal et al. 2020)	22	2											218	1
	(Ji et al., 2014) *	22												219	1
	(Penyige et al., 2019)	23	1											221	1
	(Shapira et al., 2014)	24	2											301	1
	(Ayaz et al., 2014)	24												324	1
	(Penyige et al., 2019)	25	3											325	1
	(Meng et al., 2015)	25												331	1
	(Ayaz et al., 2014)	25												337	1
	(Yokoi et al., 2017) *	26	4											374	1
	(Song et al 2020)	26												376	1
	(Penyige et al., 2019)	26												409	1
	(Chung et al., 2013) *	26												450	1
	(Ayaz et al., 2014)	27	1											483	1
	(Ayaz et al., 2014)	27												486	1
	(Resnick et al., 2009)	29	3											497	1
	(Elias et al., 2017)	29												498	1
	(Ayaz et al., 2014)	29												500	1
	(Ayaz et al., 2014)	29												513	1
	(Shapira et al., 2014)	30	2											520	1
	(Shapira et al., 2014)	30												526	1
	(Shapira et al., 2014)	30												552	1
	(Ayaz et al., 2014)	30												553	1
	(Ayaz et al., 2014)	30												576	1
	(Ayaz et al., 2014)	30												584	1
	(Todeschini et al., 2017)	32	1											595	1
	(Marton et al. 2019)*	34	2											601	1
	(Marton et al. 2019)*	34												613	1
	(Marton et al. 2019)*	34												615	1
	(Ayaz et al., 2014)	34												628	1
	(Shapira et al., 2014)	92	6											645	1
	(Resnick et al., 2009)	92												651	1
	(Guo et al 2012)	92												658	1
	(Gahlaw et al., 2022)	92												766	1
	(Elias et al., 2017)	92												939	1
	(Ayaz et al., 2014)	92												1185	1
	(Zhang et al. 2019) *	93	5											1197	1
	(Resnick et al., 2009)	93												1266	1
	(Meng et al., 2015)	93												1268	1
	(Kim et al. 2019)*	93												1274	1
	(Ji et al., 2014) *	93												1281	1
	(Zhang et al. 2019) *	99	2											1305	1
	(Resnick et al., 2009)	99												1973	1
	(Zhang et al. 2019) *	106	4											1974	1
	(Shapira et al., 2014)	106												1976	1
	(Shapira et al., 2014)	106												1979	1
	(Ji et al., 2014) *	106												2287	1
	(Ayaz et al., 2014)	106												3148	1
	(Zhang et al. 2019) *	122	1											3161	1
	(Zuberi et al., 2016)	125	5											3615	1
	(Zhu et al., 2016) *	125												3663	1
	(Penyige et al., 2019)	125												4281	1
	(Chen et al. 2020)	125												4284	1
	(Ayaz et al., 2014)	125												4290	1
	(Shapira et al., 2014)	126	3											4455	1
	(Resnick et al., 2009)	126												4479	1
	(Ayaz et al., 2014)	126												4687	1
	(Wang et al. 2019) serum	127	2											4732	1
	(Resnick et al., 2009)	127												4745	1
	(Penyige et al., 2019)	128	1											5739	1
	(Yokoi et al., 2017) *	130	1											6763	1
	(Chung et al., 2013) *	132	1											451	1
	(Marton et al. 2019)*	141	5											20	2
	(Gao & Wu, 2015)	141												22	2
	(Fitriawan et al 2020)	141												24	2
	(Cirillo et al. 2021)	141												30	2
	(Choi et al. 2020)	141												34	2
	(Yokoi et al., 2017) *	142	1											99	2
	(Wang et al. 2019) serum	143	2											127	2
	(Chung et al., 2013) *	143												143	2
	(Penyige et al., 2019)	144	1											150	2
	(Wang et al 2019) plasma	145	3											335	2
	(Kim et al. 2019)*	145												346	2
	(Chung et al., 2013) *	145												375	2
	(Shapira et al., 2014)	146	3											451	2
	(Penyige et al., 2019)	146												484	2
	(Ayaz et al., 2014)	146												548	2
	(Penyige et al., 2019)	148	1											574	2
	(Penyige et al., 2019)	149	1											590	2
	(Shapira et al., 2014)	150	2											625	2
	(Ayaz et al., 2014)	150												720	2
	(Resnick et al., 2009)	155	1											1246	2
	(Meng et al., 2015)	182	1											1273	2
	(Zhang et al. 2019) *	185	1											1290	2
	(Suryawanshi et al., 2013)* SOC	191	3											16	3
	(Suryawanshi et al., 2013)* EAOC	191												19	3
	(Shapira et al., 2014)	191												25	3
	(Ayaz et al., 2014)	191												29	3
	(Shapira et al., 2014)	193	3											126	3
	(Ren et al 2018)	193												145	3
	(Ayaz et al., 2014)	193												146	3
	(Suryawanshi et al., 2013)* SOC	195	3											191	3
	(Suryawanshi et al., 2013)* EAOC	195												193	3
	(Oliveira et al., 2019)	195												195	3
	(Zuberi et al., 2016)	199	1											205	3
	(Zhu et al., 2022) *	205	1											223	3
	(Zheng et al., 2013) *	205	3											429	3
	(Wang et al. 2019) serum	205												1307	3
	(Wang et al 2019) plasma	205												26	4
	(Ayaz et al., 2014)	206	1											106	4
	(Yokoi et al., 2018)	211	1											328	4
	(Ayaz et al., 2014)	218	1											let7	4
	(Penyige et al., 2019)	219	1											93	5
	(Oliveira et al., 2019)	221	1											125	5
	(Shapira et al., 2014)	223	3											141	5
	(Penyige et al., 2019)	223												92	6
	(Ayaz et al., 2014)	223												320	6
	(Penyige et al., 2019)	301	1											21	7
	(Shapira et al., 2014)	320	6											200b	7
	(Wang et al., 2022) *	320												200a	8
	(Gahlaw et al., 2022)	320												200c	13
	(Elias et al., 2017)	320
	(Cirillo et al. 2021)	320
	(Ayaz et al., 2014)	320
	(Ayaz et al., 2014)	324	1
	(Penyige et al., 2019)	325	1
	(Yokoi et al., 2017) *	328	4
	(Wang et al 2019) plasma	328
	(Shapira et al., 2014)	328
	(Ayaz et al., 2014)	328
	(Penyige et al., 2019)	331	1
	(Penyige et al., 2019)	331
	(Gahlaw et al., 2022)	335	2
	(Elias et al., 2017)	335
	(Penyige et al., 2019)	337	1
	(Wang et al. 2019) serum	346	2
	(Wang et al 2019) plasma	346
	(Yokoi et al., 2017) *	374	1
	(Su et al. 2019) *	375	2
	(Gahlaw et al., 2022)	375
	(Meng et al., 2015)	376	1
	(Penyige et al., 2019)	409	1
	(Meng et al., 2015)	429	3
	(Marton et al. 2019)*	429
	(Choi et al. 2020)	429
	(Elias et al., 2017)	450	1
	(Oliveira et al., 2019)	451	2
	(Ayaz et al., 2014)	451
	(Todeschini et al., 2017)	483	1
	(Ritter et al. 2020) *	484	2
	(Oliveira et al., 2019)	484
	(Gahlaw et al., 2022)	486	1
	(Penyige et al., 2019)	497	1
	(Penyige et al., 2019)	498	1
	(Penyige et al., 2019)	500	1
	(Penyige et al., 2019)	513	1
	(Penyige et al., 2019)	520	1
	(Penyige et al., 2019)	526	1
	(Penyige et al., 2019)	548	2
	(Ayaz et al., 2014)	548
	(Ayaz et al., 2014)	548
	(Penyige et al., 2019)	552	1
	(Penyige et al., 2019)	553	1
	(Todeschini et al., 2017)	574	2
	(Ayaz et al., 2014)	574
	(Ayaz et al., 2014)	576	1
	(Penyige et al., 2019)	584	1
	(Penyige et al., 2019)	590	2
	(Ayaz et al., 2014)	590
	(Todeschini et al., 2017)	595	1
	(Ayaz et al., 2014)	601	1
	(Penyige et al., 2019)	613	1
	(Penyige et al., 2019)	615	1
	(Shapira et al., 2014)	625	2
	(Penyige et al., 2019)	625
	(Penyige et al., 2019)	628	1
	(Ayaz et al., 2014)	645	1
	(Penyige et al., 2019)	651	1
	(Yokoi et al., 2018)	658	1
	(Shapira et al., 2014)	720	2
	(Ayaz et al., 2014)	720
	(Yokoi et al., 2017) *	766	1
	(Yokoi et al., 2018)	939	1
	(Penyige et al., 2019)	1185	1
	(Penyige et al., 2019)	1185
	(Penyige et al., 2019)	1197	1
	(Todeschini et al., 2017)	1246	2
	(Jeon et al., 2022) *	1246
	(Penyige et al., 2019)	1266	1
	(Yokoi et al., 2018)	1268	1
	(Yokoi et al., 2018)	1273	2
	(Liu et al. 2021)	1273
	(Shapira et al., 2014)	1274	1
	(Penyige et al., 2019)	1281	1
	(Kobayashi et al. 2018) *	1290	2
	(Jeon et al., 2022) *	1290
	(Penyige et al., 2019)	1305	1
	(Su et al. 2019) *	1307	3
	(Hashimoto et al. 2021)	1307
	(Elias et al., 2017)	1307
	(Suryawanshi et al., 2013)* SOC	1973	1
	(Suryawanshi et al., 2013)* EAOC	1973
	(Suryawanshi et al., 2013)* SOC	1974	1
	(Suryawanshi et al., 2013)* EAOC	1974
	(Penyige et al., 2019)	1976	1
	(Suryawanshi et al., 2013)* SOC	1979	1
	(Suryawanshi et al., 2013)* EAOC	1979
	(Todeschini et al., 2017)	2287	1
	(Todeschini et al., 2017)	3148	1
	(Penyige et al., 2019)	3161	1
	(Penyige et al., 2019)	3615	1
	(Yokoi et al., 2018)	3663	1
	(Todeschini et al., 2017)	4281	1
	(Suryawanshi et al., 2013)* SOC	4284	1
	(Suryawanshi et al., 2013)* EAOC	4284
	(Todeschini et al., 2017)	4290	1
	(Penyige et al., 2019)	4455	1
	(Wang et al., 2022) *	4479	1
	(Yokoi et al., 2018)	4687	1
	(Liu et al. 2021)	4732	1
	(Yokoi et al., 2018)	4745	1
	(Yokoi et al., 2018)	5739	1
	(Wang et al., 2022) *	6763	1
	(Zuberi et al 2015)	200a	8
	(Yokoi et al., 2017) *	200a
	(Savolainen et al. 2020)	200a
	(Meng et al., 2016) EV	200a
	(Meng et al., 2016)	200a
	(Marton et al. 2019)*	200a
	(Kan et al., 2012)	200a
	(Choi et al. 2020)	200a
	(Zuberi et al 2015)	200b	7
	(Savolainen et al. 2020)	200b
	(Meng et al., 2016) EV	200b
	(Meng et al., 2016)	200b
	(Marton et al. 2019)*	200b
	(Kan et al., 2012)	200b
	(Choi et al. 2020)	200b
	(Zuberi et al 2015)	200c	13
	(Hannan et al. 2022) *	200c
	(Wang et al. 2019) serum	200c
	(Savolainen et al. 2020)	200c
	(Oliveira et al., 2019)	200c
	(Meng et al., 2016) EV	200c
	(Meng et al., 2016)	200c
	(Marton et al. 2019)*	200c
	(Kim et al. 2019)*	200c
	(Kan et al., 2012)	200c
	(Gao & Wu, 2015)	200c
	(Gahlaw et al., 2022)	200c
	(Elias et al., 2017)	200c
	(Choi et al. 2020)	200c
	(Ji et al., 2014) *	451	1
	(Zheng et al., 2013) *	let7	4
	(Zhang et al. 2019) *	let7
	(Yokoi et al., 2017) *	let7
	(Chung et al., 2013) *	let7

## Sheet: Formulas used
	Value calculated	Formula used
	SD from SEM	SEM*sqrt(N)
	SD from 25th quartile	(25th quartile-average)/-0.67
	SD from 75th quartile	(75th quartile-average)/0.67
	Relative average for control group	average control group/average control group
	Relative average for OC group	average OC group/average control group
	Relative SD	SD*relative average)/average
	-95% confidence interval	relative average - (1.96*relative SD/sqrt(N))
	+95% confidence interval	relative average + (1.96*relative SD/sqrt(N))
	Fold change	relative average OC/relative average control group
